# Supplementary material for: Insight into the molecular mechanism that controls the solubility of CH4 in ionic liquids
Source: Royal Society of Chemistry journal article supplement (doi:10.1039/c9nj04973h), 2019-11-20
Supplement: c9nj04973h1.pdf [file c9nj04973h1.pdf]

# An insight into the molecular mechanism that control the solubility of CH<sub>4</sub> in ionic liquids

Kiki Adi Kurnia,<sup>1,\*</sup> Choo Jia How,<sup>2</sup> Pranesh Mathewaran,<sup>2</sup> Mohd. Hilmi Noh,<sup>2,3,\*</sup> M. Amin  
Alamsjah<sup>1</sup>

<sup>1</sup>Department of Marine, Faculty of Fisheries and Marine, Universitas Airlangga, Jalan Mulyorejo  
Kampus C, Surabaya 60115 Indonesia.

<sup>2</sup>Chemical Engineering Department, Faculty of Engineering, Universiti Teknologi PETRONAS,  
Bandar Seri Iskandar, Perak 32610 Malaysia.

<sup>3</sup>Center of Research in Ionic Liquids, Universiti Teknologi PETRONAS, Bandar Seri Iskandar, Perak  
32610 Malaysia.

Corresponding author: \*K.A. Kurnia (Email: kiki.adi@fpm.unair.ac.id), \*\*M.H. Noh  
(hilmi.noh@utp.edu.my)

## Electronic Supplementary Information

Table S1. List of ionic liquids used in this work, together with acronym, supplier, CAS-Number and other properties.

| No | Full Name                                                       | Acronym                                                 | Supplier | CAS Number   | Chemical Formula                                                                            | Molecular Weight | Purity Wt% |
|----|-----------------------------------------------------------------|---------------------------------------------------------|----------|--------------|---------------------------------------------------------------------------------------------|------------------|------------|
| 1  | 1-butyl-3-methylimidazolium acetate                             | [C <sub>4</sub> C <sub>1</sub> im][Ac]                  | Merck    | 284049-75-8  | C <sub>10</sub> H <sub>18</sub> N <sub>2</sub> O <sub>2</sub>                               | 198.26           | 95         |
| 2  | 1-Butyl-3-methylimidazolium dimethyl phosphate                  | [C <sub>4</sub> C <sub>1</sub> im][DMP]                 | Iolitec  | 891772-94-4  | C <sub>10</sub> H <sub>21</sub> N <sub>2</sub> O <sub>4</sub> P                             | 264.26           | 98         |
| 3  | 1-Butyl-3-methylimidazolium dibutyl phosphate                   | [C <sub>4</sub> C <sub>1</sub> im][DBP]                 | Iolitec  | 663199-28-8  | C <sub>16</sub> H <sub>33</sub> N <sub>2</sub> O <sub>4</sub> P                             | 348.42           | 97         |
| 4  | 1-Butyl-3-methylimidazolium thiocyanate                         | [C <sub>4</sub> C <sub>1</sub> im][SCN]                 | Merck    | 344790-87-0  | C <sub>9</sub> H <sub>15</sub> N <sub>3</sub> S                                             | 197.30           | 95         |
| 5  | 1-Butyl-3-methylimidazolium methyl sulfate                      | [C <sub>4</sub> C <sub>1</sub> im][MeSO <sub>4</sub> ]  | Merck    | 401788-98-5  | C <sub>9</sub> H <sub>18</sub> N <sub>2</sub> O <sub>4</sub> S                              | 250.32           | 97         |
| 6  | 1-Butyl-3-methylimidazolium octyl sulfate                       | [C <sub>4</sub> C <sub>1</sub> im][OcSO <sub>4</sub> ]  | Merck    | 445473-58-5  | C <sub>16</sub> H <sub>32</sub> N <sub>2</sub> O <sub>4</sub> S                             | 348.50           | 95         |
| 7  | 1-Butyl-3-methylimidazolium trifluoroacetate                    | [C <sub>4</sub> C <sub>1</sub> im][TFA]                 | Iolitec  | 174899-94-6  | C <sub>10</sub> H <sub>15</sub> F <sub>3</sub> N <sub>2</sub> O <sub>2</sub>                | 252.11           | 97         |
| 8  | 1-Butyl-3-methylimidazolium hexafluorophosphate                 | [C <sub>4</sub> C <sub>1</sub> im][PF <sub>6</sub> ]    | Iolitec  | 174501-64 -5 | C <sub>8</sub> H <sub>15</sub> F <sub>6</sub> N <sub>2</sub> P                              | 284.18           | 99         |
| 9  | 1-Butyl-3-methylimidazolium tetrafluoroborate                   | [C <sub>4</sub> C <sub>1</sub> im][BF <sub>4</sub> ]    | Iolitec  | 174501-65-6  | C <sub>8</sub> H <sub>15</sub> BF <sub>4</sub> N <sub>2</sub>                               | 226.02           | 99         |
| 10 | 1-Butyl-3-methylimidazolium bis(trifluoromethylsulfonyl)imide   | [C <sub>4</sub> C <sub>1</sub> im][Tf <sub>2</sub> N]   | Iolitec  | 174899-83-3  | C <sub>10</sub> H <sub>15</sub> F <sub>6</sub> N <sub>3</sub> O <sub>4</sub> S <sub>2</sub> | 419.37           | 99         |
| 11 | 1,3-Dimethylimidazolium bis(trifluoromethylsulfonyl)imide       | [C <sub>1</sub> C <sub>1</sub> im][Tf <sub>2</sub> N]   | Iolitec  | 174899-81-1  | C <sub>7</sub> H <sub>9</sub> F <sub>6</sub> N <sub>3</sub> O <sub>4</sub> S <sub>2</sub>   | 377.28           | 99         |
| 12 | 1-Ethyl-3-methylimidazolium bis(trifluoromethylsulfonyl)imide   | [C <sub>2</sub> C <sub>1</sub> im][Tf <sub>2</sub> N]   | Iolitec  | 174899-82-2  | C <sub>8</sub> H <sub>11</sub> F <sub>6</sub> N <sub>3</sub> O <sub>4</sub> S <sub>2</sub>  | 391.31           | 99         |
| 13 | 1-Hexyl-3-methylimidazolium bis(trifluoromethylsulfonyl)imide   | [C <sub>6</sub> C <sub>1</sub> im][Tf <sub>2</sub> N]   | Iolitec  | 382150-50-7  | C <sub>12</sub> H <sub>19</sub> F <sub>6</sub> N <sub>3</sub> O <sub>4</sub> S <sub>2</sub> | 447.42           | 99         |
| 14 | 1-Decyl-3-methylimidazolium bis(trifluoromethylsulfonyl)imide   | [C <sub>10</sub> C <sub>1</sub> im][Tf <sub>2</sub> N]  | Iolitec  | 433337-23-6  | C <sub>16</sub> H <sub>27</sub> F <sub>6</sub> N <sub>3</sub> O <sub>4</sub> S <sub>2</sub> | 505.53           | 99         |
| 15 | 1-Butyl-1-methylpiperidinium bis(trifluoromethylsulfonyl)imide  | [C <sub>4</sub> C <sub>1</sub> pip][Tf <sub>2</sub> N]  | Iolitec  | 623580-02-9  | C <sub>12</sub> H <sub>22</sub> F <sub>6</sub> N <sub>2</sub> O <sub>4</sub> S <sub>2</sub> | 436.44           | 99         |
| 16 | 1-Butyl-4-methylpyridinium bis(trifluoromethylsulfonyl)imide    | [C <sub>4</sub> C <sub>1</sub> py][Tf <sub>2</sub> N]   | Iolitec  | 475681-62-0  | C <sub>12</sub> H <sub>16</sub> F <sub>6</sub> N <sub>2</sub> O <sub>4</sub> S <sub>2</sub> | 430.39           | 99         |
| 17 | 1-Butyl-1-methylpyrrolidinium bis(trifluoromethylsulfonyl)imide | [C <sub>4</sub> C <sub>1</sub> pyrr][Tf <sub>2</sub> N] | Iolitec  | 223437-11-4  | C <sub>11</sub> H <sub>20</sub> F <sub>6</sub> N <sub>2</sub> O <sub>4</sub> S <sub>2</sub> | 422.41           | 99         |

Table S2. Experimental,  $x_{\text{CH}_4,\text{E}}$ , and predicted,  $x_{\text{CH}_4,\text{C}}$ , mole fraction solubility of  $\text{CH}_4$  in ionic liquids at different temperatures and pressure,  $P$ .

| No.                                    | $T/\text{K}$ | $p/\text{MPa}$ | $x_{\text{CH}_4,\text{E}}$ | $x_{\text{CH}_4,\text{C}}$ | ARD  |
|----------------------------------------|--------------|----------------|----------------------------|----------------------------|------|
| [C <sub>4</sub> C <sub>1</sub> im][Ac] |              |                |                            |                            |      |
| 1                                      | 298.15       | 0.12           | 0.0020                     | 0.0009                     | 0.12 |
| 2                                      | 298.15       | 0.27           | 0.0048                     | 0.0019                     | 0.29 |
| 3                                      | 298.15       | 0.57           | 0.0100                     | 0.0040                     | 0.60 |
| 4                                      | 298.15       | 1.15           | 0.0197                     | 0.0080                     | 1.17 |
| 5                                      | 298.15       | 1.80           | 0.0265                     | 0.0125                     | 1.40 |
| 6                                      | 298.15       | 2.37           | 0.0386                     | 0.0163                     | 2.23 |
| 7                                      | 298.15       | 2.93           | 0.0492                     | 0.0202                     | 2.90 |
| 8                                      | 298.15       | 3.44           | 0.0573                     | 0.0236                     | 3.36 |
| 9                                      | 298.15       | 4.06           | 0.0623                     | 0.0278                     | 3.45 |
| 10                                     | 298.15       | 4.65           | 0.0776                     | 0.0318                     | 4.58 |
| 11                                     | 298.15       | 5.24           | 0.0873                     | 0.0357                     | 5.15 |
| 12                                     | 298.15       | 5.78           | 0.0916                     | 0.0394                     | 5.22 |
| 13                                     | 298.15       | 6.25           | 0.1056                     | 0.0425                     | 6.31 |
| 14                                     | 298.15       | 6.84           | 0.1132                     | 0.0464                     | 6.68 |
| 15                                     | 313.15       | 0.10           | 0.0014                     | 0.0006                     | 0.08 |
| 16                                     | 313.15       | 0.19           | 0.0027                     | 0.0011                     | 0.15 |
| 17                                     | 313.15       | 0.47           | 0.0065                     | 0.0027                     | 0.38 |
| 18                                     | 313.15       | 1.17           | 0.0163                     | 0.0068                     | 0.95 |
| 19                                     | 313.15       | 1.81           | 0.0239                     | 0.0105                     | 1.34 |
| 20                                     | 313.15       | 2.33           | 0.0330                     | 0.0135                     | 1.95 |
| 21                                     | 313.15       | 3.57           | 0.0500                     | 0.0206                     | 2.94 |
| 22                                     | 313.15       | 4.34           | 0.0584                     | 0.0250                     | 3.34 |
| 23                                     | 313.15       | 5.21           | 0.0744                     | 0.0300                     | 4.44 |
| 24                                     | 313.15       | 5.96           | 0.0836                     | 0.0342                     | 4.94 |
| 25                                     | 313.15       | 7.03           | 0.0950                     | 0.0402                     | 5.47 |
| 26                                     | 328.15       | 0.09           | 0.0011                     | 0.0005                     | 0.06 |
| 27                                     | 328.15       | 0.31           | 0.0037                     | 0.0015                     | 0.21 |
| 28                                     | 328.15       | 1.03           | 0.0120                     | 0.0051                     | 0.68 |
| 29                                     | 328.15       | 1.99           | 0.0232                     | 0.0099                     | 1.34 |
| 30                                     | 328.15       | 2.94           | 0.0360                     | 0.0146                     | 2.14 |
| 31                                     | 328.15       | 3.57           | 0.0433                     | 0.0176                     | 2.56 |
| 32                                     | 328.15       | 4.40           | 0.0515                     | 0.0217                     | 2.98 |
| 33                                     | 328.15       | 5.02           | 0.0608                     | 0.0248                     | 3.60 |
| 34                                     | 328.15       | 5.81           | 0.0696                     | 0.0286                     | 4.10 |
| 35                                     | 328.15       | 6.86           | 0.0758                     | 0.0337                     | 4.20 |
| 36                                     | 343.15       | 0.10           | 0.0010                     | 0.0004                     | 0.06 |
| 37                                     | 343.15       | 0.44           | 0.0046                     | 0.0019                     | 0.27 |
| 38                                     | 343.15       | 1.06           | 0.0106                     | 0.0046                     | 0.60 |
| 39                                     | 343.15       | 1.86           | 0.0190                     | 0.0081                     | 1.09 |
| 40                                     | 343.15       | 2.83           | 0.0302                     | 0.0122                     | 1.80 |
| 41                                     | 343.15       | 3.45           | 0.0366                     | 0.0149                     | 2.17 |
| 42                                     | 343.15       | 4.36           | 0.0447                     | 0.0188                     | 2.59 |

|                                         |        |      |        |        |      |
|-----------------------------------------|--------|------|--------|--------|------|
| 43                                      | 343.15 | 5.05 | 0.0535 | 0.0217 | 3.17 |
| 44                                      | 343.15 | 5.78 | 0.0605 | 0.0248 | 3.57 |
| 45                                      | 343.15 | 6.69 | 0.0646 | 0.0287 | 3.59 |
| [C <sub>4</sub> C <sub>1im</sub> ][DMP] |        |      |        |        |      |
| 1                                       | 298.15 | 0.12 | 0.0020 | 0.0008 | 0.12 |
| 2                                       | 298.15 | 0.27 | 0.0047 | 0.0018 | 0.29 |
| 3                                       | 298.15 | 0.57 | 0.0097 | 0.0038 | 0.60 |
| 4                                       | 298.15 | 1.15 | 0.0192 | 0.0076 | 1.16 |
| 5                                       | 298.15 | 1.80 | 0.0259 | 0.0119 | 1.40 |
| 6                                       | 298.15 | 2.37 | 0.0379 | 0.0156 | 2.23 |
| 7                                       | 298.15 | 2.93 | 0.0482 | 0.0193 | 2.90 |
| 8                                       | 298.15 | 3.44 | 0.0562 | 0.0226 | 3.36 |
| 9                                       | 298.15 | 4.06 | 0.0612 | 0.0267 | 3.45 |
| 10                                      | 298.15 | 4.65 | 0.0763 | 0.0305 | 4.58 |
| 11                                      | 298.15 | 5.24 | 0.0858 | 0.0344 | 5.14 |
| 12                                      | 298.15 | 5.78 | 0.0901 | 0.0379 | 5.22 |
| 13                                      | 298.15 | 6.25 | 0.1040 | 0.0409 | 6.30 |
| 14                                      | 298.15 | 6.84 | 0.1115 | 0.0448 | 6.67 |
| 15                                      | 313.15 | 0.10 | 0.0014 | 0.0006 | 0.08 |
| 16                                      | 313.15 | 0.19 | 0.0027 | 0.0011 | 0.16 |
| 17                                      | 313.15 | 0.47 | 0.0065 | 0.0026 | 0.39 |
| 18                                      | 313.15 | 1.17 | 0.0162 | 0.0066 | 0.96 |
| 19                                      | 313.15 | 1.81 | 0.0238 | 0.0102 | 1.36 |
| 20                                      | 313.15 | 2.33 | 0.0329 | 0.0131 | 1.98 |
| 21                                      | 313.15 | 3.57 | 0.0498 | 0.0200 | 2.98 |
| 22                                      | 313.15 | 4.34 | 0.0583 | 0.0244 | 3.40 |
| 23                                      | 313.15 | 5.21 | 0.0743 | 0.0293 | 4.50 |
| 24                                      | 313.15 | 5.96 | 0.0836 | 0.0334 | 5.01 |
| 25                                      | 313.15 | 7.03 | 0.0950 | 0.0394 | 5.56 |
| 26                                      | 328.15 | 0.09 | 0.0011 | 0.0004 | 0.06 |
| 27                                      | 328.15 | 0.31 | 0.0037 | 0.0015 | 0.22 |
| 28                                      | 328.15 | 1.03 | 0.0121 | 0.0051 | 0.70 |
| 29                                      | 328.15 | 1.99 | 0.0235 | 0.0097 | 1.38 |
| 30                                      | 328.15 | 2.94 | 0.0364 | 0.0144 | 2.20 |
| 31                                      | 328.15 | 3.57 | 0.0438 | 0.0174 | 2.64 |
| 32                                      | 328.15 | 4.40 | 0.0522 | 0.0215 | 3.07 |
| 33                                      | 328.15 | 5.02 | 0.0616 | 0.0245 | 3.71 |
| 34                                      | 328.15 | 5.81 | 0.0706 | 0.0284 | 4.22 |
| 35                                      | 328.15 | 6.86 | 0.0768 | 0.0335 | 4.34 |
| 36                                      | 343.15 | 0.10 | 0.0011 | 0.0004 | 0.06 |
| 37                                      | 343.15 | 0.44 | 0.0047 | 0.0019 | 0.28 |
| 38                                      | 343.15 | 1.06 | 0.0109 | 0.0046 | 0.63 |
| 39                                      | 343.15 | 1.86 | 0.0195 | 0.0081 | 1.14 |
| 40                                      | 343.15 | 2.83 | 0.0310 | 0.0122 | 1.88 |
| 41                                      | 343.15 | 3.45 | 0.0376 | 0.0149 | 2.27 |
| 42                                      | 343.15 | 4.36 | 0.0459 | 0.0188 | 2.71 |
| 43                                      | 343.15 | 5.05 | 0.0549 | 0.0218 | 3.31 |
| 44                                      | 343.15 | 5.78 | 0.0622 | 0.0250 | 3.73 |

|                                         |        |      |        |        |      |
|-----------------------------------------|--------|------|--------|--------|------|
| 45                                      | 343.15 | 6.69 | 0.0674 | 0.0289 | 3.86 |
| [C <sub>4</sub> C <sub>1</sub> im][DBP] |        |      |        |        |      |
| 1                                       | 298.15 | 0.20 | 0.0048 | 0.0018 | 0.30 |
| 2                                       | 298.15 | 0.42 | 0.0103 | 0.0037 | 0.65 |
| 3                                       | 298.15 | 0.85 | 0.0195 | 0.0076 | 1.19 |
| 4                                       | 298.15 | 1.37 | 0.0310 | 0.0122 | 1.88 |
| 5                                       | 298.15 | 1.83 | 0.0417 | 0.0163 | 2.55 |
| 6                                       | 298.15 | 2.28 | 0.0552 | 0.0203 | 3.50 |
| 7                                       | 298.15 | 2.70 | 0.0604 | 0.0239 | 3.65 |
| 8                                       | 298.15 | 3.18 | 0.0712 | 0.0282 | 4.30 |
| 9                                       | 298.15 | 3.65 | 0.0805 | 0.0324 | 4.81 |
| 10                                      | 298.15 | 4.13 | 0.0916 | 0.0366 | 5.50 |
| 11                                      | 298.15 | 4.57 | 0.1050 | 0.0405 | 6.45 |
| 12                                      | 298.15 | 4.95 | 0.1087 | 0.0439 | 6.49 |
| 13                                      | 298.15 | 6.41 | 0.1404 | 0.0567 | 8.37 |
| 14                                      | 298.15 | 7.39 | 0.1609 | 0.0653 | 9.56 |
| 15                                      | 313.15 | 0.14 | 0.0032 | 0.0011 | 0.21 |
| 16                                      | 313.15 | 0.34 | 0.0069 | 0.0026 | 0.42 |
| 17                                      | 313.15 | 0.85 | 0.0169 | 0.0066 | 1.03 |
| 18                                      | 313.15 | 1.37 | 0.0277 | 0.0105 | 1.71 |
| 19                                      | 313.15 | 1.80 | 0.0349 | 0.0139 | 2.10 |
| 20                                      | 313.15 | 2.71 | 0.0576 | 0.0208 | 3.68 |
| 21                                      | 313.15 | 3.38 | 0.0662 | 0.0260 | 4.02 |
| 22                                      | 313.15 | 4.07 | 0.0779 | 0.0312 | 4.67 |
| 23                                      | 313.15 | 4.69 | 0.0971 | 0.0359 | 6.11 |
| 24                                      | 313.15 | 6.51 | 0.1238 | 0.0498 | 7.40 |
| 25                                      | 313.15 | 7.67 | 0.1453 | 0.0586 | 8.66 |
| 26                                      | 328.15 | 0.12 | 0.0022 | 0.0008 | 0.14 |
| 27                                      | 328.15 | 0.74 | 0.0136 | 0.0050 | 0.86 |
| 28                                      | 328.15 | 1.48 | 0.0257 | 0.0100 | 1.57 |
| 29                                      | 328.15 | 2.24 | 0.0395 | 0.0151 | 2.44 |
| 30                                      | 328.15 | 2.78 | 0.0476 | 0.0188 | 2.88 |
| 31                                      | 328.15 | 3.42 | 0.0593 | 0.0231 | 3.62 |
| 32                                      | 328.15 | 3.95 | 0.0677 | 0.0266 | 4.11 |
| 33                                      | 328.15 | 5.56 | 0.0880 | 0.0375 | 5.05 |
| 34                                      | 328.15 | 6.37 | 0.1067 | 0.0429 | 6.38 |
| 35                                      | 328.15 | 7.52 | 0.1262 | 0.0505 | 7.57 |
| 36                                      | 343.15 | 0.18 | 0.0031 | 0.0011 | 0.20 |
| 37                                      | 343.15 | 0.35 | 0.0051 | 0.0021 | 0.30 |
| 38                                      | 343.15 | 0.85 | 0.0161 | 0.0051 | 1.10 |
| 39                                      | 343.15 | 1.49 | 0.0229 | 0.0090 | 1.40 |
| 40                                      | 343.15 | 2.27 | 0.0393 | 0.0136 | 2.56 |
| 41                                      | 343.15 | 2.77 | 0.0422 | 0.0166 | 2.56 |
| 42                                      | 343.15 | 3.49 | 0.0531 | 0.0210 | 3.21 |
| 43                                      | 343.15 | 4.05 | 0.0615 | 0.0243 | 3.72 |
| 44                                      | 343.15 | 5.63 | 0.0845 | 0.0338 | 5.07 |
| 45                                      | 343.15 | 6.84 | 0.1031 | 0.0410 | 6.21 |
| [C <sub>4</sub> C <sub>1</sub> im][SCN] |        |      |        |        |      |

|                                                        |        |      |        |        |      |
|--------------------------------------------------------|--------|------|--------|--------|------|
| 1                                                      | 298.15 | 0.13 | 0.0010 | 0.0005 | 0.06 |
| 2                                                      | 298.15 | 0.29 | 0.0024 | 0.0010 | 0.14 |
| 3                                                      | 298.15 | 0.60 | 0.0051 | 0.0021 | 0.30 |
| 4                                                      | 298.15 | 1.21 | 0.0100 | 0.0042 | 0.58 |
| 5                                                      | 298.15 | 1.91 | 0.0136 | 0.0066 | 0.70 |
| 6                                                      | 298.15 | 2.50 | 0.0199 | 0.0087 | 1.12 |
| 7                                                      | 298.15 | 3.09 | 0.0254 | 0.0107 | 1.47 |
| 8                                                      | 298.15 | 3.63 | 0.0296 | 0.0126 | 1.70 |
| 9                                                      | 298.15 | 4.28 | 0.0324 | 0.0149 | 1.75 |
| 10                                                     | 298.15 | 4.91 | 0.0404 | 0.0171 | 2.33 |
| 11                                                     | 298.15 | 5.53 | 0.0456 | 0.0193 | 2.63 |
| 12                                                     | 298.15 | 6.10 | 0.0480 | 0.0213 | 2.67 |
| 13                                                     | 298.15 | 6.59 | 0.0555 | 0.0231 | 3.24 |
| 14                                                     | 298.15 | 7.22 | 0.0596 | 0.0253 | 3.44 |
| 15                                                     | 313.15 | 0.11 | 0.0008 | 0.0003 | 0.04 |
| 16                                                     | 313.15 | 0.20 | 0.0014 | 0.0006 | 0.08 |
| 17                                                     | 313.15 | 0.49 | 0.0035 | 0.0015 | 0.20 |
| 18                                                     | 313.15 | 1.23 | 0.0088 | 0.0038 | 0.50 |
| 19                                                     | 313.15 | 1.91 | 0.0129 | 0.0058 | 0.71 |
| 20                                                     | 313.15 | 2.46 | 0.0179 | 0.0075 | 1.04 |
| 21                                                     | 313.15 | 3.76 | 0.0272 | 0.0115 | 1.57 |
| 22                                                     | 313.15 | 4.58 | 0.0320 | 0.0140 | 1.79 |
| 23                                                     | 313.15 | 5.50 | 0.0408 | 0.0169 | 2.39 |
| 24                                                     | 313.15 | 6.29 | 0.0461 | 0.0194 | 2.67 |
| 25                                                     | 313.15 | 7.42 | 0.0526 | 0.0229 | 2.97 |
| 26                                                     | 328.15 | 0.10 | 0.0006 | 0.0003 | 0.03 |
| 27                                                     | 328.15 | 0.32 | 0.0021 | 0.0009 | 0.12 |
| 28                                                     | 328.15 | 1.09 | 0.0068 | 0.0030 | 0.38 |
| 29                                                     | 328.15 | 2.10 | 0.0132 | 0.0057 | 0.75 |
| 30                                                     | 328.15 | 3.11 | 0.0205 | 0.0085 | 1.20 |
| 31                                                     | 328.15 | 3.76 | 0.0248 | 0.0103 | 1.44 |
| 32                                                     | 328.15 | 4.64 | 0.0296 | 0.0128 | 1.68 |
| 33                                                     | 328.15 | 5.30 | 0.0350 | 0.0146 | 2.04 |
| 34                                                     | 328.15 | 6.14 | 0.0402 | 0.0169 | 2.32 |
| 35                                                     | 328.15 | 7.24 | 0.0439 | 0.0200 | 2.39 |
| 36                                                     | 343.15 | 0.11 | 0.0006 | 0.0003 | 0.04 |
| 37                                                     | 343.15 | 0.47 | 0.0027 | 0.0012 | 0.16 |
| 38                                                     | 343.15 | 1.11 | 0.0063 | 0.0028 | 0.35 |
| 39                                                     | 343.15 | 1.97 | 0.0113 | 0.0049 | 0.64 |
| 40                                                     | 343.15 | 2.99 | 0.0180 | 0.0074 | 1.06 |
| 41                                                     | 343.15 | 3.64 | 0.0219 | 0.0091 | 1.28 |
| 42                                                     | 343.15 | 4.60 | 0.0268 | 0.0115 | 1.53 |
| 43                                                     | 343.15 | 5.33 | 0.0322 | 0.0134 | 1.88 |
| 44                                                     | 343.15 | 6.10 | 0.0365 | 0.0153 | 2.12 |
| 45                                                     | 343.15 | 7.06 | 0.0411 | 0.0177 | 2.34 |
| [C <sub>4</sub> C <sub>1</sub> im][MeSO <sub>4</sub> ] |        |      |        |        |      |
| 1                                                      | 298.15 | 0.14 | 0.0009 | 0.0006 | 0.02 |
| 2                                                      | 298.15 | 0.30 | 0.0016 | 0.0013 | 0.03 |

|                                                        |        |      |        |        |      |
|--------------------------------------------------------|--------|------|--------|--------|------|
| 3                                                      | 298.15 | 0.62 | 0.0036 | 0.0028 | 0.09 |
| 4                                                      | 298.15 | 1.25 | 0.0072 | 0.0056 | 0.16 |
| 5                                                      | 298.15 | 1.96 | 0.0108 | 0.0088 | 0.19 |
| 6                                                      | 298.15 | 2.57 | 0.0142 | 0.0116 | 0.26 |
| 7                                                      | 298.15 | 3.17 | 0.0180 | 0.0144 | 0.37 |
| 8                                                      | 298.15 | 3.73 | 0.0211 | 0.0169 | 0.42 |
| 9                                                      | 298.15 | 4.40 | 0.0244 | 0.0199 | 0.45 |
| 10                                                     | 298.15 | 5.04 | 0.0274 | 0.0228 | 0.46 |
| 11                                                     | 298.15 | 5.67 | 0.0316 | 0.0257 | 0.59 |
| 12                                                     | 298.15 | 6.27 | 0.0339 | 0.0284 | 0.55 |
| 13                                                     | 298.15 | 6.77 | 0.0372 | 0.0307 | 0.64 |
| 14                                                     | 298.15 | 7.41 | 0.0421 | 0.0336 | 0.84 |
| 15                                                     | 313.15 | 0.11 | 0.0006 | 0.0004 | 0.02 |
| 16                                                     | 313.15 | 0.21 | 0.0011 | 0.0008 | 0.02 |
| 17                                                     | 313.15 | 0.50 | 0.0025 | 0.0020 | 0.05 |
| 18                                                     | 313.15 | 1.27 | 0.0062 | 0.0050 | 0.13 |
| 19                                                     | 313.15 | 1.96 | 0.0102 | 0.0077 | 0.25 |
| 20                                                     | 313.15 | 2.52 | 0.0130 | 0.0099 | 0.31 |
| 21                                                     | 313.15 | 3.86 | 0.0167 | 0.0152 | 0.15 |
| 22                                                     | 313.15 | 4.70 | 0.0225 | 0.0185 | 0.39 |
| 23                                                     | 313.15 | 5.65 | 0.0285 | 0.0223 | 0.62 |
| 24                                                     | 313.15 | 6.46 | 0.0321 | 0.0255 | 0.66 |
| 25                                                     | 313.15 | 7.62 | 0.0366 | 0.0301 | 0.65 |
| 26                                                     | 328.15 | 0.10 | 0.0005 | 0.0003 | 0.01 |
| 27                                                     | 328.15 | 0.33 | 0.0015 | 0.0012 | 0.03 |
| 28                                                     | 328.15 | 1.12 | 0.0048 | 0.0039 | 0.09 |
| 29                                                     | 328.15 | 2.15 | 0.0098 | 0.0075 | 0.23 |
| 30                                                     | 328.15 | 3.19 | 0.0129 | 0.0111 | 0.18 |
| 31                                                     | 328.15 | 3.86 | 0.0154 | 0.0135 | 0.19 |
| 32                                                     | 328.15 | 4.76 | 0.0204 | 0.0166 | 0.37 |
| 33                                                     | 328.15 | 5.44 | 0.0241 | 0.0190 | 0.51 |
| 34                                                     | 328.15 | 6.30 | 0.0275 | 0.0220 | 0.55 |
| 35                                                     | 328.15 | 7.43 | 0.0301 | 0.0260 | 0.41 |
| 36                                                     | 343.15 | 0.11 | 0.0005 | 0.0003 | 0.02 |
| 37                                                     | 343.15 | 0.48 | 0.0018 | 0.0015 | 0.03 |
| 38                                                     | 343.15 | 1.14 | 0.0047 | 0.0036 | 0.11 |
| 39                                                     | 343.15 | 2.02 | 0.0082 | 0.0063 | 0.19 |
| 40                                                     | 343.15 | 3.06 | 0.0106 | 0.0096 | 0.10 |
| 41                                                     | 343.15 | 3.74 | 0.0145 | 0.0117 | 0.27 |
| 42                                                     | 343.15 | 4.73 | 0.0182 | 0.0148 | 0.34 |
| 43                                                     | 343.15 | 5.48 | 0.0219 | 0.0172 | 0.47 |
| 44                                                     | 343.15 | 6.26 | 0.0247 | 0.0197 | 0.50 |
| 45                                                     | 343.15 | 7.25 | 0.0265 | 0.0228 | 0.37 |
| [C <sub>4</sub> C <sub>1</sub> im][OcSO <sub>4</sub> ] |        |      |        |        |      |
| 1                                                      | 298.15 | 0.13 | 0.0028 | 0.0010 | 0.18 |
| 2                                                      | 298.15 | 0.27 | 0.0061 | 0.0022 | 0.39 |
| 3                                                      | 298.15 | 0.57 | 0.0127 | 0.0045 | 0.82 |
| 4                                                      | 298.15 | 1.16 | 0.0241 | 0.0092 | 1.49 |

|                                         |        |      |        |        |      |
|-----------------------------------------|--------|------|--------|--------|------|
| 5                                       | 298.15 | 1.82 | 0.0330 | 0.0145 | 1.85 |
| 6                                       | 298.15 | 2.38 | 0.0482 | 0.0190 | 2.93 |
| 7                                       | 298.15 | 2.95 | 0.0605 | 0.0235 | 3.71 |
| 8                                       | 298.15 | 3.46 | 0.0712 | 0.0276 | 4.36 |
| 9                                       | 298.15 | 4.08 | 0.0895 | 0.0325 | 5.69 |
| 10                                      | 298.15 | 4.68 | 0.1048 | 0.0373 | 6.75 |
| 11                                      | 298.15 | 5.27 | 0.1128 | 0.0420 | 7.08 |
| 12                                      | 298.15 | 5.82 | 0.1185 | 0.0464 | 7.21 |
| 13                                      | 298.15 | 6.29 | 0.1249 | 0.0502 | 7.47 |
| 14                                      | 298.15 | 6.88 | 0.1403 | 0.0549 | 8.55 |
| 15                                      | 313.15 | 0.10 | 0.0020 | 0.0007 | 0.13 |
| 16                                      | 313.15 | 0.19 | 0.0036 | 0.0014 | 0.23 |
| 17                                      | 313.15 | 0.47 | 0.0088 | 0.0033 | 0.55 |
| 18                                      | 313.15 | 1.18 | 0.0209 | 0.0082 | 1.26 |
| 19                                      | 313.15 | 1.82 | 0.0351 | 0.0127 | 2.24 |
| 20                                      | 313.15 | 2.34 | 0.0445 | 0.0164 | 2.82 |
| 21                                      | 313.15 | 3.59 | 0.0590 | 0.0251 | 3.39 |
| 22                                      | 313.15 | 4.36 | 0.0767 | 0.0305 | 4.62 |
| 23                                      | 313.15 | 5.24 | 0.0963 | 0.0367 | 5.97 |
| 24                                      | 313.15 | 6.00 | 0.1085 | 0.0419 | 6.66 |
| 25                                      | 313.15 | 7.07 | 0.1227 | 0.0495 | 7.32 |
| 26                                      | 328.15 | 0.09 | 0.0016 | 0.0006 | 0.10 |
| 27                                      | 328.15 | 0.31 | 0.0052 | 0.0019 | 0.33 |
| 28                                      | 328.15 | 1.04 | 0.0157 | 0.0065 | 0.93 |
| 29                                      | 328.15 | 2.00 | 0.0338 | 0.0124 | 2.14 |
| 30                                      | 328.15 | 2.96 | 0.0494 | 0.0184 | 3.10 |
| 31                                      | 328.15 | 3.59 | 0.0541 | 0.0223 | 3.18 |
| 32                                      | 328.15 | 4.42 | 0.0690 | 0.0275 | 4.15 |
| 33                                      | 328.15 | 5.05 | 0.0817 | 0.0314 | 5.03 |
| 34                                      | 328.15 | 5.85 | 0.0937 | 0.0364 | 5.73 |
| 35                                      | 328.15 | 6.90 | 0.1013 | 0.0429 | 5.83 |
| 36                                      | 343.15 | 0.10 | 0.0016 | 0.0006 | 0.10 |
| 37                                      | 343.15 | 0.45 | 0.0065 | 0.0025 | 0.40 |
| 38                                      | 343.15 | 1.06 | 0.0163 | 0.0060 | 1.03 |
| 39                                      | 343.15 | 1.87 | 0.0278 | 0.0105 | 1.73 |
| 40                                      | 343.15 | 2.85 | 0.0362 | 0.0159 | 2.02 |
| 41                                      | 343.15 | 3.47 | 0.0495 | 0.0195 | 3.00 |
| 42                                      | 343.15 | 4.39 | 0.0616 | 0.0246 | 3.71 |
| 43                                      | 343.15 | 5.08 | 0.0742 | 0.0285 | 4.57 |
| 44                                      | 343.15 | 5.82 | 0.0840 | 0.0326 | 5.14 |
| 45                                      | 343.15 | 6.73 | 0.0897 | 0.0377 | 5.20 |
| [C <sub>4</sub> C <sub>1</sub> im][TFA] |        |      |        |        |      |
| 1                                       | 298.15 | 0.19 | 0.0022 | 0.0008 | 0.13 |
| 2                                       | 298.15 | 0.39 | 0.0044 | 0.0017 | 0.27 |
| 3                                       | 298.15 | 0.78 | 0.0094 | 0.0035 | 0.59 |
| 4                                       | 298.15 | 1.23 | 0.0146 | 0.0055 | 0.91 |
| 5                                       | 298.15 | 1.61 | 0.0161 | 0.0072 | 0.89 |
| 6                                       | 298.15 | 2.00 | 0.0224 | 0.0089 | 1.35 |



|                                                      |        |      |        |        |      |
|------------------------------------------------------|--------|------|--------|--------|------|
| 7                                                    | 298.15 | 2.35 | 0.0272 | 0.0105 | 1.67 |
| 8                                                    | 298.15 | 2.77 | 0.0318 | 0.0123 | 1.95 |
| 9                                                    | 298.15 | 3.17 | 0.0352 | 0.0142 | 2.10 |
| 10                                                   | 298.15 | 3.57 | 0.0448 | 0.0160 | 2.88 |
| 11                                                   | 298.15 | 3.94 | 0.0481 | 0.0177 | 3.04 |
| 12                                                   | 298.15 | 4.26 | 0.0529 | 0.0191 | 3.38 |
| 13                                                   | 298.15 | 5.66 | 0.0632 | 0.0255 | 3.77 |
| 14                                                   | 298.15 | 6.57 | 0.0759 | 0.0297 | 4.62 |
| 15                                                   | 313.15 | 0.13 | 0.0015 | 0.0005 | 0.10 |
| 16                                                   | 313.15 | 0.32 | 0.0032 | 0.0012 | 0.20 |
| 17                                                   | 313.15 | 0.80 | 0.0080 | 0.0031 | 0.49 |
| 18                                                   | 313.15 | 1.23 | 0.0128 | 0.0048 | 0.80 |
| 19                                                   | 313.15 | 1.59 | 0.0152 | 0.0062 | 0.90 |
| 20                                                   | 313.15 | 2.43 | 0.0253 | 0.0095 | 1.58 |
| 21                                                   | 313.15 | 2.96 | 0.0287 | 0.0116 | 1.71 |
| 22                                                   | 313.15 | 3.56 | 0.0348 | 0.0140 | 2.08 |
| 23                                                   | 313.15 | 4.07 | 0.0421 | 0.0160 | 2.61 |
| 24                                                   | 313.15 | 5.80 | 0.0585 | 0.0230 | 3.56 |
| 25                                                   | 313.15 | 6.83 | 0.0674 | 0.0272 | 4.02 |
| 26                                                   | 328.15 | 0.21 | 0.0019 | 0.0007 | 0.12 |
| 27                                                   | 328.15 | 0.70 | 0.0067 | 0.0025 | 0.42 |
| 28                                                   | 328.15 | 1.36 | 0.0117 | 0.0047 | 0.69 |
| 29                                                   | 328.15 | 2.01 | 0.0192 | 0.0070 | 1.22 |
| 30                                                   | 328.15 | 2.43 | 0.0230 | 0.0085 | 1.45 |
| 31                                                   | 328.15 | 3.00 | 0.0271 | 0.0105 | 1.66 |
| 32                                                   | 328.15 | 3.42 | 0.0306 | 0.0120 | 1.85 |
| 33                                                   | 328.15 | 4.97 | 0.0450 | 0.0175 | 2.74 |
| 34                                                   | 328.15 | 5.68 | 0.0511 | 0.0201 | 3.11 |
| 35                                                   | 328.15 | 7.20 | 0.0607 | 0.0256 | 3.51 |
| 36                                                   | 343.15 | 0.17 | 0.0015 | 0.0005 | 0.10 |
| 37                                                   | 343.15 | 0.30 | 0.0023 | 0.0010 | 0.13 |
| 38                                                   | 343.15 | 0.72 | 0.0061 | 0.0023 | 0.38 |
| 39                                                   | 343.15 | 1.27 | 0.0107 | 0.0040 | 0.67 |
| 40                                                   | 343.15 | 1.93 | 0.0141 | 0.0061 | 0.80 |
| 41                                                   | 343.15 | 2.36 | 0.0189 | 0.0075 | 1.14 |
| 42                                                   | 343.15 | 2.97 | 0.0238 | 0.0095 | 1.43 |
| 43                                                   | 343.15 | 3.45 | 0.0286 | 0.0110 | 1.76 |
| 44                                                   | 343.15 | 4.94 | 0.0401 | 0.0158 | 2.43 |
| 45                                                   | 343.15 | 5.86 | 0.0447 | 0.0188 | 2.60 |
| [C <sub>4</sub> C <sub>1</sub> im][PF <sub>6</sub> ] |        |      |        |        |      |
| 1                                                    | 298.15 | 0.17 | 0.0014 | 0.0005 | 0.08 |
| 2                                                    | 298.15 | 0.26 | 0.0024 | 0.0008 | 0.15 |
| 3                                                    | 298.15 | 0.55 | 0.0048 | 0.0017 | 0.31 |
| 4                                                    | 298.15 | 1.11 | 0.0079 | 0.0034 | 0.44 |
| 5                                                    | 298.15 | 1.75 | 0.0140 | 0.0054 | 0.86 |
| 6                                                    | 298.15 | 2.29 | 0.0185 | 0.0071 | 1.14 |
| 7                                                    | 298.15 | 2.84 | 0.0213 | 0.0088 | 1.26 |
| 8                                                    | 298.15 | 3.33 | 0.0252 | 0.0103 | 1.49 |

|                                                      |        |      |        |        |      |
|------------------------------------------------------|--------|------|--------|--------|------|
| 9                                                    | 298.15 | 3.93 | 0.0311 | 0.0122 | 1.89 |
| 10                                                   | 298.15 | 4.50 | 0.0353 | 0.0141 | 2.12 |
| 11                                                   | 298.15 | 5.07 | 0.0401 | 0.0159 | 2.42 |
| 12                                                   | 298.15 | 5.60 | 0.0445 | 0.0176 | 2.68 |
| 13                                                   | 298.15 | 6.05 | 0.0476 | 0.0191 | 2.84 |
| 14                                                   | 298.15 | 6.62 | 0.0524 | 0.0210 | 3.14 |
| 15                                                   | 313.15 | 0.10 | 0.0007 | 0.0003 | 0.04 |
| 16                                                   | 313.15 | 0.19 | 0.0021 | 0.0005 | 0.16 |
| 17                                                   | 313.15 | 0.45 | 0.0036 | 0.0013 | 0.24 |
| 18                                                   | 313.15 | 1.13 | 0.0088 | 0.0032 | 0.56 |
| 19                                                   | 313.15 | 1.75 | 0.0118 | 0.0050 | 0.68 |
| 20                                                   | 313.15 | 2.26 | 0.0155 | 0.0064 | 0.90 |
| 21                                                   | 313.15 | 3.45 | 0.0254 | 0.0099 | 1.55 |
| 22                                                   | 313.15 | 4.20 | 0.0305 | 0.0121 | 1.83 |
| 23                                                   | 313.15 | 5.05 | 0.0369 | 0.0146 | 2.23 |
| 24                                                   | 313.15 | 5.78 | 0.0425 | 0.0168 | 2.57 |
| 25                                                   | 313.15 | 6.81 | 0.0496 | 0.0199 | 2.96 |
| 26                                                   | 328.15 | 0.09 | 0.0006 | 0.0002 | 0.04 |
| 27                                                   | 328.15 | 0.30 | 0.0025 | 0.0008 | 0.17 |
| 28                                                   | 328.15 | 1.00 | 0.0076 | 0.0027 | 0.49 |
| 29                                                   | 328.15 | 1.93 | 0.0134 | 0.0051 | 0.83 |
| 30                                                   | 328.15 | 2.85 | 0.0199 | 0.0076 | 1.22 |
| 31                                                   | 328.15 | 3.45 | 0.0226 | 0.0093 | 1.33 |
| 32                                                   | 328.15 | 4.26 | 0.0281 | 0.0115 | 1.66 |
| 33                                                   | 328.15 | 4.86 | 0.0334 | 0.0132 | 2.02 |
| 34                                                   | 328.15 | 5.63 | 0.0383 | 0.0153 | 2.30 |
| 35                                                   | 328.15 | 6.64 | 0.0455 | 0.0181 | 2.74 |
| 36                                                   | 343.15 | 0.10 | 0.0006 | 0.0002 | 0.04 |
| 37                                                   | 343.15 | 0.43 | 0.0027 | 0.0011 | 0.17 |
| 38                                                   | 343.15 | 1.02 | 0.0068 | 0.0026 | 0.43 |
| 39                                                   | 343.15 | 1.80 | 0.0120 | 0.0045 | 0.75 |
| 40                                                   | 343.15 | 2.74 | 0.0185 | 0.0069 | 1.16 |
| 41                                                   | 343.15 | 3.34 | 0.0222 | 0.0085 | 1.37 |
| 42                                                   | 343.15 | 4.22 | 0.0264 | 0.0107 | 1.57 |
| 43                                                   | 343.15 | 4.90 | 0.0306 | 0.0125 | 1.81 |
| 44                                                   | 343.15 | 5.60 | 0.0367 | 0.0143 | 2.24 |
| 45                                                   | 343.15 | 6.48 | 0.0426 | 0.0166 | 2.59 |
| [C <sub>4</sub> C <sub>1</sub> im][BF <sub>4</sub> ] |        |      |        |        |      |
| 1                                                    | 298.15 | 0.16 | 0.0012 | 0.0005 | 0.07 |
| 2                                                    | 298.15 | 0.24 | 0.0024 | 0.0007 | 0.17 |
| 3                                                    | 298.15 | 0.50 | 0.0043 | 0.0015 | 0.28 |
| 4                                                    | 298.15 | 1.01 | 0.0063 | 0.0030 | 0.33 |
| 5                                                    | 298.15 | 1.59 | 0.0125 | 0.0047 | 0.78 |
| 6                                                    | 298.15 | 2.08 | 0.0163 | 0.0062 | 1.00 |
| 7                                                    | 298.15 | 2.58 | 0.0190 | 0.0077 | 1.13 |
| 8                                                    | 298.15 | 3.03 | 0.0230 | 0.0091 | 1.39 |
| 9                                                    | 298.15 | 3.57 | 0.0272 | 0.0107 | 1.65 |
| 10                                                   | 298.15 | 4.09 | 0.0308 | 0.0123 | 1.85 |

|                                                       |        |      |        |        |      |
|-------------------------------------------------------|--------|------|--------|--------|------|
| 11                                                    | 298.15 | 4.61 | 0.0340 | 0.0139 | 2.01 |
| 12                                                    | 298.15 | 5.09 | 0.0392 | 0.0154 | 2.38 |
| 13                                                    | 298.15 | 5.50 | 0.0424 | 0.0166 | 2.58 |
| 14                                                    | 298.15 | 6.02 | 0.0459 | 0.0182 | 2.77 |
| 15                                                    | 313.15 | 0.09 | 0.0006 | 0.0002 | 0.04 |
| 16                                                    | 313.15 | 0.17 | 0.0021 | 0.0005 | 0.16 |
| 17                                                    | 313.15 | 0.41 | 0.0035 | 0.0011 | 0.24 |
| 18                                                    | 313.15 | 1.03 | 0.0069 | 0.0027 | 0.42 |
| 19                                                    | 313.15 | 1.59 | 0.0107 | 0.0042 | 0.65 |
| 20                                                    | 313.15 | 2.05 | 0.0140 | 0.0055 | 0.85 |
| 21                                                    | 313.15 | 3.14 | 0.0225 | 0.0084 | 1.41 |
| 22                                                    | 313.15 | 3.82 | 0.0267 | 0.0103 | 1.65 |
| 23                                                    | 313.15 | 4.59 | 0.0322 | 0.0124 | 1.99 |
| 24                                                    | 313.15 | 5.25 | 0.0369 | 0.0142 | 2.27 |
| 25                                                    | 313.15 | 6.19 | 0.0421 | 0.0168 | 2.54 |
| 26                                                    | 328.15 | 0.08 | 0.0005 | 0.0002 | 0.03 |
| 27                                                    | 328.15 | 0.27 | 0.0024 | 0.0007 | 0.17 |
| 28                                                    | 328.15 | 0.91 | 0.0058 | 0.0022 | 0.36 |
| 29                                                    | 328.15 | 1.75 | 0.0121 | 0.0043 | 0.78 |
| 30                                                    | 328.15 | 2.59 | 0.0174 | 0.0063 | 1.11 |
| 31                                                    | 328.15 | 3.14 | 0.0179 | 0.0077 | 1.03 |
| 32                                                    | 328.15 | 3.87 | 0.0239 | 0.0095 | 1.44 |
| 33                                                    | 328.15 | 4.42 | 0.0275 | 0.0108 | 1.66 |
| 34                                                    | 328.15 | 5.12 | 0.0313 | 0.0126 | 1.88 |
| 35                                                    | 328.15 | 6.04 | 0.0373 | 0.0148 | 2.24 |
| 36                                                    | 343.15 | 0.09 | 0.0005 | 0.0002 | 0.03 |
| 37                                                    | 343.15 | 0.39 | 0.0022 | 0.0009 | 0.13 |
| 38                                                    | 343.15 | 0.93 | 0.0055 | 0.0021 | 0.35 |
| 39                                                    | 343.15 | 1.64 | 0.0097 | 0.0037 | 0.61 |
| 40                                                    | 343.15 | 2.49 | 0.0148 | 0.0056 | 0.92 |
| 41                                                    | 343.15 | 3.04 | 0.0175 | 0.0068 | 1.07 |
| 42                                                    | 343.15 | 3.84 | 0.0222 | 0.0086 | 1.36 |
| 43                                                    | 343.15 | 4.45 | 0.0243 | 0.0100 | 1.43 |
| 44                                                    | 343.15 | 5.09 | 0.0279 | 0.0115 | 1.64 |
| 45                                                    | 343.15 | 5.89 | 0.0336 | 0.0133 | 2.03 |
| [C <sub>4</sub> C <sub>1</sub> im][Tf <sub>2</sub> N] |        |      |        |        |      |
| 1                                                     | 298.15 | 0.12 | 0.0019 | 0.0007 | 0.12 |
| 2                                                     | 298.15 | 0.27 | 0.0045 | 0.0017 | 0.29 |
| 3                                                     | 298.15 | 0.56 | 0.0093 | 0.0035 | 0.59 |
| 4                                                     | 298.15 | 1.13 | 0.0170 | 0.0070 | 1.00 |
| 5                                                     | 298.15 | 1.77 | 0.0284 | 0.0110 | 1.74 |
| 6                                                     | 298.15 | 2.33 | 0.0373 | 0.0145 | 2.28 |
| 7                                                     | 298.15 | 2.88 | 0.0446 | 0.0180 | 2.66 |
| 8                                                     | 298.15 | 3.38 | 0.0526 | 0.0212 | 3.14 |
| 9                                                     | 298.15 | 3.99 | 0.0633 | 0.0251 | 3.82 |
| 10                                                    | 298.15 | 4.57 | 0.0720 | 0.0288 | 4.33 |
| 11                                                    | 298.15 | 5.15 | 0.0814 | 0.0325 | 4.89 |
| 12                                                    | 298.15 | 5.69 | 0.0901 | 0.0360 | 5.41 |

|                                                       |        |      |        |        |      |
|-------------------------------------------------------|--------|------|--------|--------|------|
| 13                                                    | 298.15 | 6.14 | 0.0968 | 0.0390 | 5.78 |
| 14                                                    | 298.15 | 6.72 | 0.1062 | 0.0428 | 6.34 |
| 15                                                    | 313.15 | 0.10 | 0.0014 | 0.0006 | 0.09 |
| 16                                                    | 313.15 | 0.19 | 0.0035 | 0.0011 | 0.25 |
| 17                                                    | 313.15 | 0.46 | 0.0070 | 0.0026 | 0.44 |
| 18                                                    | 313.15 | 1.15 | 0.0171 | 0.0065 | 1.06 |
| 19                                                    | 313.15 | 1.78 | 0.0246 | 0.0100 | 1.46 |
| 20                                                    | 313.15 | 2.29 | 0.0319 | 0.0129 | 1.90 |
| 21                                                    | 313.15 | 3.51 | 0.0505 | 0.0199 | 3.06 |
| 22                                                    | 313.15 | 4.27 | 0.0609 | 0.0242 | 3.67 |
| 23                                                    | 313.15 | 5.13 | 0.0734 | 0.0292 | 4.42 |
| 24                                                    | 313.15 | 5.86 | 0.0841 | 0.0335 | 5.06 |
| 25                                                    | 313.15 | 6.91 | 0.0985 | 0.0397 | 5.88 |
| 26                                                    | 328.15 | 0.09 | 0.0012 | 0.0005 | 0.07 |
| 27                                                    | 328.15 | 0.30 | 0.0045 | 0.0015 | 0.29 |
| 28                                                    | 328.15 | 1.02 | 0.0141 | 0.0052 | 0.89 |
| 29                                                    | 328.15 | 1.95 | 0.0260 | 0.0101 | 1.59 |
| 30                                                    | 328.15 | 2.89 | 0.0384 | 0.0150 | 2.35 |
| 31                                                    | 328.15 | 3.51 | 0.0451 | 0.0182 | 2.69 |
| 32                                                    | 328.15 | 4.32 | 0.0557 | 0.0224 | 3.32 |
| 33                                                    | 328.15 | 4.94 | 0.0649 | 0.0257 | 3.92 |
| 34                                                    | 328.15 | 5.72 | 0.0746 | 0.0298 | 4.48 |
| 35                                                    | 328.15 | 6.75 | 0.0883 | 0.0353 | 5.30 |
| 36                                                    | 343.15 | 0.10 | 0.0012 | 0.0005 | 0.07 |
| 37                                                    | 343.15 | 0.44 | 0.0053 | 0.0021 | 0.32 |
| 38                                                    | 343.15 | 1.04 | 0.0129 | 0.0049 | 0.79 |
| 39                                                    | 343.15 | 1.83 | 0.0227 | 0.0087 | 1.39 |
| 40                                                    | 343.15 | 2.78 | 0.0346 | 0.0133 | 2.13 |
| 41                                                    | 343.15 | 3.40 | 0.0418 | 0.0162 | 2.56 |
| 42                                                    | 343.15 | 4.29 | 0.0512 | 0.0205 | 3.06 |
| 43                                                    | 343.15 | 4.97 | 0.0591 | 0.0238 | 3.53 |
| 44                                                    | 343.15 | 5.69 | 0.0693 | 0.0273 | 4.20 |
| 45                                                    | 343.15 | 6.58 | 0.0812 | 0.0317 | 4.95 |
| [C <sub>1</sub> C <sub>1</sub> im][Tf <sub>2</sub> N] |        |      |        |        |      |
| 1                                                     | 298.15 | 0.14 | 0.0010 | 0.0010 | 0.06 |
| 2                                                     | 298.15 | 0.44 | 0.0042 | 0.0042 | 0.28 |
| 3                                                     | 298.15 | 1.10 | 0.0097 | 0.0097 | 0.60 |
| 4                                                     | 298.15 | 1.54 | 0.0122 | 0.0122 | 0.70 |
| 5                                                     | 298.15 | 2.13 | 0.0181 | 0.0181 | 1.09 |
| 6                                                     | 298.15 | 2.88 | 0.0240 | 0.0240 | 1.42 |
| 7                                                     | 298.15 | 3.58 | 0.0314 | 0.0314 | 1.91 |
| 8                                                     | 298.15 | 4.06 | 0.0355 | 0.0355 | 2.16 |
| 9                                                     | 298.15 | 4.96 | 0.0414 | 0.0414 | 2.43 |
| 10                                                    | 298.15 | 5.54 | 0.0497 | 0.0497 | 3.05 |
| 11                                                    | 298.15 | 6.29 | 0.0539 | 0.0539 | 3.20 |
| 12                                                    | 298.15 | 6.94 | 0.0582 | 0.0582 | 3.40 |
| 13                                                    | 298.15 | 7.33 | 0.0603 | 0.0603 | 3.46 |
| 14                                                    | 298.15 | 7.81 | 0.0717 | 0.0717 | 4.42 |

|                                                       |        |      |        |        |      |
|-------------------------------------------------------|--------|------|--------|--------|------|
| 15                                                    | 313.15 | 0.17 | 0.0015 | 0.0015 | 0.10 |
| 16                                                    | 313.15 | 0.41 | 0.0026 | 0.0026 | 0.14 |
| 17                                                    | 313.15 | 0.77 | 0.0065 | 0.0065 | 0.41 |
| 18                                                    | 313.15 | 1.25 | 0.0099 | 0.0099 | 0.60 |
| 19                                                    | 313.15 | 1.89 | 0.0152 | 0.0152 | 0.93 |
| 20                                                    | 313.15 | 2.55 | 0.0191 | 0.0191 | 1.11 |
| 21                                                    | 313.15 | 3.37 | 0.0266 | 0.0266 | 1.59 |
| 22                                                    | 313.15 | 4.39 | 0.0336 | 0.0336 | 1.95 |
| 23                                                    | 313.15 | 5.04 | 0.0394 | 0.0394 | 2.32 |
| 24                                                    | 313.15 | 6.10 | 0.0516 | 0.0516 | 3.19 |
| 25                                                    | 313.15 | 7.14 | 0.0572 | 0.0572 | 3.40 |
| 26                                                    | 328.15 | 0.21 | 0.0020 | 0.0020 | 0.14 |
| 27                                                    | 328.15 | 0.78 | 0.0062 | 0.0062 | 0.39 |
| 28                                                    | 328.15 | 1.46 | 0.0103 | 0.0103 | 0.60 |
| 29                                                    | 328.15 | 2.03 | 0.0143 | 0.0143 | 0.82 |
| 30                                                    | 328.15 | 2.90 | 0.0217 | 0.0217 | 1.30 |
| 31                                                    | 328.15 | 3.72 | 0.0267 | 0.0267 | 1.55 |
| 32                                                    | 328.15 | 4.34 | 0.0347 | 0.0347 | 2.17 |
| 33                                                    | 328.15 | 5.59 | 0.0427 | 0.0427 | 2.58 |
| 34                                                    | 328.15 | 6.58 | 0.0494 | 0.0494 | 2.94 |
| 35                                                    | 328.15 | 7.33 | 0.0563 | 0.0563 | 3.39 |
| 36                                                    | 343.15 | 0.17 | 0.0008 | 0.0008 | 0.03 |
| 37                                                    | 343.15 | 0.59 | 0.0037 | 0.0037 | 0.20 |
| 38                                                    | 343.15 | 1.01 | 0.0078 | 0.0078 | 0.50 |
| 39                                                    | 343.15 | 1.58 | 0.0105 | 0.0105 | 0.61 |
| 40                                                    | 343.15 | 2.37 | 0.0159 | 0.0159 | 0.92 |
| 41                                                    | 343.15 | 3.00 | 0.0212 | 0.0212 | 1.27 |
| 42                                                    | 343.15 | 4.01 | 0.0273 | 0.0273 | 1.59 |
| 43                                                    | 343.15 | 5.14 | 0.0388 | 0.0388 | 2.41 |
| 44                                                    | 343.15 | 6.67 | 0.0483 | 0.0483 | 2.91 |
| 45                                                    | 343.15 | 7.38 | 0.0527 | 0.0527 | 3.14 |
| [C <sub>2</sub> C <sub>1</sub> im][Tf <sub>2</sub> N] |        |      |        |        |      |
| 1                                                     | 298.15 | 0.11 | 0.0010 | 0.0005 | 0.05 |
| 2                                                     | 298.15 | 0.39 | 0.0049 | 0.0017 | 0.32 |
| 3                                                     | 298.15 | 0.80 | 0.0094 | 0.0035 | 0.59 |
| 4                                                     | 298.15 | 1.25 | 0.0128 | 0.0055 | 0.73 |
| 5                                                     | 298.15 | 1.85 | 0.0207 | 0.0082 | 1.25 |
| 6                                                     | 298.15 | 2.60 | 0.0284 | 0.0116 | 1.68 |
| 7                                                     | 298.15 | 3.10 | 0.0353 | 0.0138 | 2.15 |
| 8                                                     | 298.15 | 3.57 | 0.0407 | 0.0160 | 2.48 |
| 9                                                     | 298.15 | 4.58 | 0.0499 | 0.0206 | 2.93 |
| 10                                                    | 298.15 | 5.18 | 0.0598 | 0.0234 | 3.64 |
| 11                                                    | 298.15 | 5.93 | 0.0674 | 0.0269 | 4.05 |
| 12                                                    | 298.15 | 6.58 | 0.0736 | 0.0300 | 4.36 |
| 13                                                    | 298.15 | 6.96 | 0.0791 | 0.0318 | 4.74 |
| 14                                                    | 298.15 | 7.04 | 0.0819 | 0.0321 | 4.98 |
| 15                                                    | 313.15 | 0.19 | 0.0022 | 0.0008 | 0.14 |
| 16                                                    | 313.15 | 0.44 | 0.0038 | 0.0018 | 0.20 |

|                                                       |        |      |        |        |      |
|-------------------------------------------------------|--------|------|--------|--------|------|
| 17                                                    | 313.15 | 0.76 | 0.0082 | 0.0031 | 0.51 |
| 18                                                    | 313.15 | 1.26 | 0.0129 | 0.0051 | 0.78 |
| 19                                                    | 313.15 | 1.72 | 0.0178 | 0.0070 | 1.08 |
| 20                                                    | 313.15 | 2.37 | 0.0234 | 0.0097 | 1.37 |
| 21                                                    | 313.15 | 3.31 | 0.0335 | 0.0136 | 2.00 |
| 22                                                    | 313.15 | 4.37 | 0.0446 | 0.0180 | 2.65 |
| 23                                                    | 313.15 | 5.08 | 0.0543 | 0.0210 | 3.33 |
| 24                                                    | 313.15 | 6.17 | 0.0645 | 0.0257 | 3.88 |
| 25                                                    | 313.15 | 7.11 | 0.0740 | 0.0297 | 4.42 |
| 26                                                    | 328.15 | 0.13 | 0.0012 | 0.0005 | 0.08 |
| 27                                                    | 328.15 | 0.34 | 0.0038 | 0.0013 | 0.25 |
| 28                                                    | 328.15 | 1.15 | 0.0111 | 0.0043 | 0.68 |
| 29                                                    | 328.15 | 1.79 | 0.0164 | 0.0068 | 0.97 |
| 30                                                    | 328.15 | 2.73 | 0.0258 | 0.0104 | 1.55 |
| 31                                                    | 328.15 | 3.56 | 0.0335 | 0.0136 | 1.99 |
| 32                                                    | 328.15 | 4.23 | 0.0418 | 0.0162 | 2.56 |
| 33                                                    | 328.15 | 5.49 | 0.0533 | 0.0211 | 3.22 |
| 34                                                    | 328.15 | 6.52 | 0.0626 | 0.0252 | 3.74 |
| 35                                                    | 328.15 | 7.06 | 0.0685 | 0.0273 | 4.11 |
| 36                                                    | 343.15 | 0.19 | 0.0023 | 0.0007 | 0.16 |
| 37                                                    | 343.15 | 0.57 | 0.0047 | 0.0020 | 0.27 |
| 38                                                    | 343.15 | 0.90 | 0.0088 | 0.0032 | 0.56 |
| 39                                                    | 343.15 | 1.42 | 0.0125 | 0.0050 | 0.75 |
| 40                                                    | 343.15 | 1.88 | 0.0154 | 0.0067 | 0.88 |
| 41                                                    | 343.15 | 2.52 | 0.0223 | 0.0090 | 1.34 |
| 42                                                    | 343.15 | 3.60 | 0.0315 | 0.0128 | 1.86 |
| 43                                                    | 343.15 | 4.74 | 0.0406 | 0.0170 | 2.35 |
| 44                                                    | 343.15 | 6.30 | 0.0582 | 0.0227 | 3.55 |
| 45                                                    | 343.15 | 7.08 | 0.0644 | 0.0256 | 3.88 |
| [C <sub>6</sub> C <sub>1</sub> im][Tf <sub>2</sub> N] |        |      |        |        |      |
| 1                                                     | 298.15 | 0.14 | 0.0031 | 0.0011 | 0.21 |
| 2                                                     | 298.15 | 0.44 | 0.0088 | 0.0034 | 0.53 |
| 3                                                     | 298.15 | 0.82 | 0.0168 | 0.0063 | 1.04 |
| 4                                                     | 298.15 | 1.39 | 0.0270 | 0.0108 | 1.62 |
| 5                                                     | 298.15 | 1.84 | 0.0346 | 0.0142 | 2.04 |
| 6                                                     | 298.15 | 2.61 | 0.0493 | 0.0202 | 2.91 |
| 7                                                     | 298.15 | 3.13 | 0.0651 | 0.0244 | 4.07 |
| 8                                                     | 298.15 | 3.62 | 0.0713 | 0.0281 | 4.31 |
| 9                                                     | 298.15 | 4.56 | 0.0854 | 0.0356 | 4.98 |
| 10                                                    | 298.15 | 5.28 | 0.1085 | 0.0413 | 6.72 |
| 11                                                    | 298.15 | 6.05 | 0.1184 | 0.0475 | 7.09 |
| 12                                                    | 298.15 | 6.72 | 0.1248 | 0.0528 | 7.19 |
| 13                                                    | 298.15 | 7.10 | 0.1314 | 0.0559 | 7.55 |
| 14                                                    | 298.15 | 7.91 | 0.1414 | 0.0624 | 7.90 |
| 15                                                    | 313.15 | 0.11 | 0.0023 | 0.0008 | 0.16 |
| 16                                                    | 313.15 | 0.39 | 0.0068 | 0.0027 | 0.41 |
| 17                                                    | 313.15 | 0.56 | 0.0104 | 0.0039 | 0.66 |
| 18                                                    | 313.15 | 1.21 | 0.0212 | 0.0084 | 1.29 |

|                                                         |        |      |        |        |       |
|---------------------------------------------------------|--------|------|--------|--------|-------|
| 19                                                      | 313.15 | 1.61 | 0.0293 | 0.0111 | 1.82  |
| 20                                                      | 313.15 | 2.37 | 0.0403 | 0.0165 | 2.38  |
| 21                                                      | 313.15 | 3.28 | 0.0565 | 0.0228 | 3.37  |
| 22                                                      | 313.15 | 4.51 | 0.0761 | 0.0315 | 4.46  |
| 23                                                      | 313.15 | 5.40 | 0.0985 | 0.0378 | 6.06  |
| 24                                                      | 313.15 | 6.45 | 0.1137 | 0.0453 | 6.84  |
| 25                                                      | 313.15 | 7.42 | 0.1298 | 0.0522 | 7.76  |
| 26                                                      | 328.15 | 0.14 | 0.0021 | 0.0009 | 0.12  |
| 27                                                      | 328.15 | 0.30 | 0.0058 | 0.0019 | 0.39  |
| 28                                                      | 328.15 | 0.97 | 0.0156 | 0.0061 | 0.95  |
| 29                                                      | 328.15 | 1.72 | 0.0266 | 0.0108 | 1.58  |
| 30                                                      | 328.15 | 2.76 | 0.0427 | 0.0174 | 2.53  |
| 31                                                      | 328.15 | 3.63 | 0.0566 | 0.0229 | 3.37  |
| 32                                                      | 328.15 | 4.47 | 0.0746 | 0.0283 | 4.63  |
| 33                                                      | 328.15 | 5.37 | 0.0853 | 0.0340 | 5.13  |
| 34                                                      | 328.15 | 6.28 | 0.0995 | 0.0398 | 5.97  |
| 35                                                      | 328.15 | 7.23 | 0.1144 | 0.0460 | 6.84  |
| 36                                                      | 343.15 | 0.11 | 0.0024 | 0.0006 | 0.18  |
| 37                                                      | 343.15 | 0.47 | 0.0073 | 0.0027 | 0.46  |
| 38                                                      | 343.15 | 0.83 | 0.0124 | 0.0047 | 0.76  |
| 39                                                      | 343.15 | 1.42 | 0.0210 | 0.0082 | 1.28  |
| 40                                                      | 343.15 | 1.99 | 0.0284 | 0.0115 | 1.69  |
| 41                                                      | 343.15 | 2.67 | 0.0375 | 0.0154 | 2.21  |
| 42                                                      | 343.15 | 3.84 | 0.0540 | 0.0222 | 3.19  |
| 43                                                      | 343.15 | 5.03 | 0.0713 | 0.0291 | 4.22  |
| 44                                                      | 343.15 | 6.65 | 0.1006 | 0.0386 | 6.20  |
| 45                                                      | 343.15 | 7.32 | 0.1061 | 0.0425 | 6.36  |
| [C <sub>10</sub> Cl <sub>1</sub> im][Tf <sub>2</sub> N] |        |      |        |        |       |
| 1                                                       | 298.15 | 0.14 | 0.0053 | 0.0015 | 0.38  |
| 2                                                       | 298.15 | 0.40 | 0.0119 | 0.0043 | 0.76  |
| 3                                                       | 298.15 | 0.74 | 0.0194 | 0.0079 | 1.15  |
| 4                                                       | 298.15 | 1.14 | 0.0314 | 0.0121 | 1.93  |
| 5                                                       | 298.15 | 1.73 | 0.0458 | 0.0184 | 2.74  |
| 6                                                       | 298.15 | 2.52 | 0.0654 | 0.0268 | 3.86  |
| 7                                                       | 298.15 | 3.06 | 0.0855 | 0.0326 | 5.30  |
| 8                                                       | 298.15 | 3.56 | 0.0967 | 0.0378 | 5.89  |
| 9                                                       | 298.15 | 4.43 | 0.1168 | 0.0471 | 6.98  |
| 10                                                      | 298.15 | 5.18 | 0.1431 | 0.0550 | 8.81  |
| 11                                                      | 298.15 | 5.88 | 0.1552 | 0.0625 | 9.27  |
| 12                                                      | 298.15 | 6.57 | 0.1664 | 0.0698 | 9.66  |
| 13                                                      | 298.15 | 7.05 | 0.1768 | 0.0748 | 10.19 |
| 14                                                      | 298.15 | 7.88 | 0.1848 | 0.0837 | 10.11 |
| 15                                                      | 313.15 | 0.13 | 0.0044 | 0.0013 | 0.32  |
| 16                                                      | 313.15 | 0.43 | 0.0111 | 0.0040 | 0.70  |
| 17                                                      | 313.15 | 0.66 | 0.0151 | 0.0062 | 0.89  |
| 18                                                      | 313.15 | 1.16 | 0.0270 | 0.0110 | 1.61  |
| 19                                                      | 313.15 | 1.49 | 0.0386 | 0.0141 | 2.45  |
| 20                                                      | 313.15 | 2.27 | 0.0531 | 0.0214 | 3.17  |

|                                                        |        |      |        |        |      |
|--------------------------------------------------------|--------|------|--------|--------|------|
| 21                                                     | 313.15 | 3.05 | 0.0697 | 0.0286 | 4.11 |
| 22                                                     | 313.15 | 4.24 | 0.0967 | 0.0399 | 5.68 |
| 23                                                     | 313.15 | 5.02 | 0.1247 | 0.0472 | 7.75 |
| 24                                                     | 313.15 | 5.74 | 0.1353 | 0.0539 | 8.14 |
| 25                                                     | 313.15 | 6.93 | 0.1616 | 0.0651 | 9.65 |
| 26                                                     | 328.15 | 0.16 | 0.0034 | 0.0013 | 0.21 |
| 27                                                     | 328.15 | 0.37 | 0.0086 | 0.0031 | 0.55 |
| 28                                                     | 328.15 | 0.89 | 0.0187 | 0.0075 | 1.12 |
| 29                                                     | 328.15 | 1.65 | 0.0344 | 0.0139 | 2.05 |
| 30                                                     | 328.15 | 2.80 | 0.0592 | 0.0236 | 3.57 |
| 31                                                     | 328.15 | 3.60 | 0.0742 | 0.0303 | 4.39 |
| 32                                                     | 328.15 | 4.52 | 0.0997 | 0.0381 | 6.17 |
| 33                                                     | 328.15 | 5.45 | 0.1151 | 0.0459 | 6.92 |
| 34                                                     | 328.15 | 6.33 | 0.1342 | 0.0532 | 8.10 |
| 35                                                     | 328.15 | 7.21 | 0.1515 | 0.0606 | 9.09 |
| 36                                                     | 343.15 | 0.13 | 0.0025 | 0.0010 | 0.14 |
| 37                                                     | 343.15 | 0.46 | 0.0102 | 0.0035 | 0.66 |
| 38                                                     | 343.15 | 0.75 | 0.0157 | 0.0058 | 0.99 |
| 39                                                     | 343.15 | 1.32 | 0.0249 | 0.0101 | 1.48 |
| 40                                                     | 343.15 | 2.00 | 0.0375 | 0.0152 | 2.22 |
| 41                                                     | 343.15 | 2.71 | 0.0517 | 0.0207 | 3.10 |
| 42                                                     | 343.15 | 3.97 | 0.0745 | 0.0303 | 4.42 |
| 43                                                     | 343.15 | 4.82 | 0.0887 | 0.0367 | 5.20 |
| 44                                                     | 343.15 | 5.89 | 0.1173 | 0.0449 | 7.24 |
| 45                                                     | 343.15 | 6.66 | 0.1269 | 0.0507 | 7.62 |
| [C <sub>4</sub> C <sub>1</sub> pip][Tf <sub>2</sub> N] |        |      |        |        |      |
| 1                                                      | 298.15 | 0.13 | 0.0026 | 0.0010 | 0.16 |
| 2                                                      | 298.15 | 0.49 | 0.0123 | 0.0036 | 0.86 |
| 3                                                      | 298.15 | 0.99 | 0.0187 | 0.0074 | 1.14 |
| 4                                                      | 298.15 | 1.54 | 0.0293 | 0.0116 | 1.77 |
| 5                                                      | 298.15 | 2.02 | 0.0383 | 0.0152 | 2.31 |
| 6                                                      | 298.15 | 2.49 | 0.0473 | 0.0188 | 2.85 |
| 7                                                      | 298.15 | 2.93 | 0.0555 | 0.0221 | 3.34 |
| 8                                                      | 298.15 | 3.45 | 0.0653 | 0.0261 | 3.93 |
| 9                                                      | 298.15 | 3.95 | 0.0748 | 0.0299 | 4.49 |
| 10                                                     | 298.15 | 4.45 | 0.0812 | 0.0338 | 4.74 |
| 11                                                     | 298.15 | 4.91 | 0.0928 | 0.0373 | 5.55 |
| 12                                                     | 298.15 | 5.31 | 0.1002 | 0.0404 | 5.98 |
| 13                                                     | 298.15 | 7.08 | 0.1332 | 0.0543 | 7.90 |
| 14                                                     | 298.15 | 8.22 | 0.1545 | 0.0633 | 9.12 |
| 15                                                     | 313.15 | 0.17 | 0.0028 | 0.0011 | 0.17 |
| 16                                                     | 313.15 | 0.40 | 0.0069 | 0.0027 | 0.42 |
| 17                                                     | 313.15 | 1.00 | 0.0172 | 0.0068 | 1.04 |
| 18                                                     | 313.15 | 1.54 | 0.0294 | 0.0104 | 1.90 |
| 19                                                     | 313.15 | 1.98 | 0.0339 | 0.0134 | 2.05 |
| 20                                                     | 313.15 | 3.05 | 0.0520 | 0.0207 | 3.14 |
| 21                                                     | 313.15 | 3.69 | 0.0630 | 0.0251 | 3.79 |
| 22                                                     | 313.15 | 4.44 | 0.0716 | 0.0302 | 4.13 |



|                                                       |        |      |        |        |      |
|-------------------------------------------------------|--------|------|--------|--------|------|
| 23                                                    | 313.15 | 5.07 | 0.0863 | 0.0346 | 5.17 |
| 24                                                    | 313.15 | 7.25 | 0.1229 | 0.0499 | 7.31 |
| 25                                                    | 313.15 | 8.55 | 0.1447 | 0.0591 | 8.56 |
| 26                                                    | 328.15 | 0.16 | 0.0026 | 0.0010 | 0.16 |
| 27                                                    | 328.15 | 0.89 | 0.0179 | 0.0055 | 1.24 |
| 28                                                    | 328.15 | 1.70 | 0.0266 | 0.0105 | 1.61 |
| 29                                                    | 328.15 | 2.51 | 0.0391 | 0.0155 | 2.36 |
| 30                                                    | 328.15 | 3.04 | 0.0472 | 0.0187 | 2.85 |
| 31                                                    | 328.15 | 3.74 | 0.0581 | 0.0231 | 3.50 |
| 32                                                    | 328.15 | 4.27 | 0.0692 | 0.0264 | 4.28 |
| 33                                                    | 328.15 | 6.22 | 0.0961 | 0.0387 | 5.74 |
| 34                                                    | 328.15 | 7.11 | 0.1110 | 0.0443 | 6.67 |
| 35                                                    | 328.15 | 8.52 | 0.1311 | 0.0533 | 7.78 |
| 36                                                    | 343.15 | 0.11 | 0.0016 | 0.0006 | 0.10 |
| 37                                                    | 343.15 | 0.38 | 0.0084 | 0.0021 | 0.63 |
| 38                                                    | 343.15 | 0.90 | 0.0129 | 0.0051 | 0.78 |
| 39                                                    | 343.15 | 1.58 | 0.0226 | 0.0089 | 1.37 |
| 40                                                    | 343.15 | 2.40 | 0.0313 | 0.0136 | 1.77 |
| 41                                                    | 343.15 | 2.93 | 0.0419 | 0.0166 | 2.53 |
| 42                                                    | 343.15 | 3.70 | 0.0528 | 0.0210 | 3.18 |
| 43                                                    | 343.15 | 4.29 | 0.0581 | 0.0243 | 3.38 |
| 44                                                    | 343.15 | 6.17 | 0.0877 | 0.0352 | 5.25 |
| 45                                                    | 343.15 | 7.51 | 0.1063 | 0.0429 | 6.34 |
| [C <sub>4</sub> C <sub>1</sub> py][Tf <sub>2</sub> N] |        |      |        |        |      |
| 1                                                     | 298.15 | 0.11 | 0.0021 | 0.0008 | 0.14 |
| 2                                                     | 298.15 | 0.36 | 0.0071 | 0.0026 | 0.44 |
| 3                                                     | 298.15 | 0.94 | 0.0188 | 0.0069 | 1.19 |
| 4                                                     | 298.15 | 1.42 | 0.0260 | 0.0104 | 1.55 |
| 5                                                     | 298.15 | 2.03 | 0.0362 | 0.0149 | 2.13 |
| 6                                                     | 298.15 | 2.62 | 0.0471 | 0.0193 | 2.78 |
| 7                                                     | 298.15 | 3.17 | 0.0566 | 0.0234 | 3.32 |
| 8                                                     | 298.15 | 3.81 | 0.0745 | 0.0282 | 4.64 |
| 9                                                     | 298.15 | 4.44 | 0.0862 | 0.0329 | 5.33 |
| 10                                                    | 298.15 | 5.06 | 0.0976 | 0.0376 | 6.00 |
| 11                                                    | 298.15 | 5.64 | 0.1056 | 0.0420 | 6.36 |
| 12                                                    | 298.15 | 6.14 | 0.1117 | 0.0459 | 6.58 |
| 13                                                    | 298.15 | 6.61 | 0.1203 | 0.0494 | 7.09 |
| 14                                                    | 298.15 | 7.42 | 0.1434 | 0.0557 | 8.77 |
| 15                                                    | 313.15 | 0.14 | 0.0026 | 0.0009 | 0.16 |
| 16                                                    | 313.15 | 0.36 | 0.0070 | 0.0023 | 0.46 |
| 17                                                    | 313.15 | 0.85 | 0.0142 | 0.0056 | 0.86 |
| 18                                                    | 313.15 | 1.53 | 0.0247 | 0.0101 | 1.46 |
| 19                                                    | 313.15 | 2.09 | 0.0371 | 0.0138 | 2.33 |
| 20                                                    | 313.15 | 2.71 | 0.0436 | 0.0179 | 2.57 |
| 21                                                    | 313.15 | 3.29 | 0.0527 | 0.0218 | 3.10 |
| 22                                                    | 313.15 | 4.20 | 0.0680 | 0.0279 | 4.01 |
| 23                                                    | 313.15 | 4.71 | 0.0751 | 0.0313 | 4.38 |
| 24                                                    | 313.15 | 6.65 | 0.1142 | 0.0445 | 6.96 |

|                                                         |        |      |        |        |      |
|---------------------------------------------------------|--------|------|--------|--------|------|
| 25                                                      | 313.15 | 7.70 | 0.1284 | 0.0517 | 7.67 |
| 26                                                      | 328.15 | 0.19 | 0.0032 | 0.0011 | 0.20 |
| 27                                                      | 328.15 | 0.70 | 0.0116 | 0.0042 | 0.74 |
| 28                                                      | 328.15 | 1.38 | 0.0207 | 0.0082 | 1.25 |
| 29                                                      | 328.15 | 2.39 | 0.0353 | 0.0143 | 2.10 |
| 30                                                      | 328.15 | 3.09 | 0.0458 | 0.0186 | 2.72 |
| 31                                                      | 328.15 | 3.94 | 0.0576 | 0.0237 | 3.39 |
| 32                                                      | 328.15 | 4.43 | 0.0698 | 0.0267 | 4.32 |
| 33                                                      | 328.15 | 5.60 | 0.0854 | 0.0339 | 5.15 |
| 34                                                      | 328.15 | 6.48 | 0.0980 | 0.0392 | 5.87 |
| 35                                                      | 328.15 | 7.93 | 0.1192 | 0.0482 | 7.10 |
| 36                                                      | 343.15 | 0.14 | 0.0027 | 0.0008 | 0.19 |
| 37                                                      | 343.15 | 0.47 | 0.0070 | 0.0026 | 0.44 |
| 38                                                      | 343.15 | 0.92 | 0.0123 | 0.0050 | 0.73 |
| 39                                                      | 343.15 | 1.47 | 0.0206 | 0.0081 | 1.25 |
| 40                                                      | 343.15 | 2.19 | 0.0297 | 0.0120 | 1.77 |
| 41                                                      | 343.15 | 2.85 | 0.0380 | 0.0157 | 2.23 |
| 42                                                      | 343.15 | 3.71 | 0.0543 | 0.0205 | 3.38 |
| 43                                                      | 343.15 | 4.34 | 0.0606 | 0.0240 | 3.66 |
| 44                                                      | 343.15 | 6.27 | 0.0866 | 0.0348 | 5.19 |
| 45                                                      | 343.15 | 7.54 | 0.1048 | 0.0419 | 6.29 |
| [C <sub>4</sub> C <sub>1</sub> pyrr][Tf <sub>2</sub> N] |        |      |        |        |      |
| 1                                                       | 298.15 | 0.17 | 0.0038 | 0.0012 | 0.26 |
| 2                                                       | 298.15 | 0.49 | 0.0089 | 0.0033 | 0.56 |
| 3                                                       | 298.15 | 0.99 | 0.0171 | 0.0066 | 1.04 |
| 4                                                       | 298.15 | 1.51 | 0.0258 | 0.0102 | 1.56 |
| 5                                                       | 298.15 | 1.94 | 0.0321 | 0.0131 | 1.90 |
| 6                                                       | 298.15 | 2.38 | 0.0392 | 0.0161 | 2.31 |
| 7                                                       | 298.15 | 2.78 | 0.0454 | 0.0188 | 2.66 |
| 8                                                       | 298.15 | 3.28 | 0.0550 | 0.0223 | 3.27 |
| 9                                                       | 298.15 | 3.74 | 0.0628 | 0.0255 | 3.73 |
| 10                                                      | 298.15 | 4.20 | 0.0715 | 0.0287 | 4.28 |
| 11                                                      | 298.15 | 4.63 | 0.0752 | 0.0316 | 4.36 |
| 12                                                      | 298.15 | 4.98 | 0.0809 | 0.0341 | 4.68 |
| 13                                                      | 298.15 | 6.82 | 0.1124 | 0.0471 | 6.52 |
| 14                                                      | 298.15 | 7.98 | 0.1314 | 0.0554 | 7.60 |
| 15                                                      | 313.15 | 0.16 | 0.0024 | 0.0010 | 0.14 |
| 16                                                      | 313.15 | 0.40 | 0.0072 | 0.0025 | 0.47 |
| 17                                                      | 313.15 | 1.02 | 0.0157 | 0.0062 | 0.95 |
| 18                                                      | 313.15 | 1.51 | 0.0228 | 0.0092 | 1.36 |
| 19                                                      | 313.15 | 1.91 | 0.0308 | 0.0117 | 1.91 |
| 20                                                      | 313.15 | 2.98 | 0.0453 | 0.0183 | 2.70 |
| 21                                                      | 313.15 | 3.52 | 0.0523 | 0.0217 | 3.06 |
| 22                                                      | 313.15 | 4.23 | 0.0622 | 0.0261 | 3.61 |
| 23                                                      | 313.15 | 4.80 | 0.0707 | 0.0297 | 4.11 |
| 24                                                      | 313.15 | 7.04 | 0.1020 | 0.0439 | 5.81 |
| 25                                                      | 313.15 | 8.31 | 0.1262 | 0.0520 | 7.41 |
| 26                                                      | 328.15 | 0.16 | 0.0026 | 0.0009 | 0.17 |

|    |        |      |        |        |      |
|----|--------|------|--------|--------|------|
| 27 | 328.15 | 0.92 | 0.0130 | 0.0051 | 0.78 |
| 28 | 328.15 | 1.70 | 0.0241 | 0.0095 | 1.46 |
| 29 | 328.15 | 2.45 | 0.0341 | 0.0137 | 2.03 |
| 30 | 328.15 | 2.89 | 0.0394 | 0.0162 | 2.31 |
| 31 | 328.15 | 3.58 | 0.0482 | 0.0201 | 2.81 |
| 32 | 328.15 | 4.04 | 0.0551 | 0.0227 | 3.24 |
| 33 | 328.15 | 5.05 | 0.0713 | 0.0285 | 4.28 |
| 34 | 328.15 | 5.91 | 0.0833 | 0.0334 | 4.99 |
| 35 | 328.15 | 7.28 | 0.1024 | 0.0414 | 6.10 |
| 36 | 343.15 | 0.12 | 0.0022 | 0.0006 | 0.16 |
| 37 | 343.15 | 0.35 | 0.0049 | 0.0018 | 0.31 |
| 38 | 343.15 | 0.83 | 0.0105 | 0.0043 | 0.62 |
| 39 | 343.15 | 1.47 | 0.0187 | 0.0076 | 1.12 |
| 40 | 343.15 | 2.23 | 0.0282 | 0.0115 | 1.67 |
| 41 | 343.15 | 2.72 | 0.0346 | 0.0141 | 2.05 |
| 42 | 343.15 | 3.43 | 0.0467 | 0.0178 | 2.90 |
| 43 | 343.15 | 3.98 | 0.0516 | 0.0206 | 3.10 |
| 44 | 343.15 | 5.91 | 0.0773 | 0.0308 | 4.65 |
| 45 | 343.15 | 7.23 | 0.0939 | 0.0378 | 5.61 |

Table S3. Predicted volume of cation and anion of ionic liquids using COSMO-RS

|                                                         | $V_{m,COSMO}/nm^3$ |        |              |
|---------------------------------------------------------|--------------------|--------|--------------|
|                                                         | Cation             | Anion  | Ionic Liquid |
| [C <sub>4</sub> C <sub>1</sub> im][Ac]                  | 0.1997             | 0.0724 | 0.2721       |
| [C <sub>4</sub> C <sub>1</sub> im][BF <sub>4</sub> ]    | 0.1996             | 0.0729 | 0.2725       |
| [C <sub>4</sub> C <sub>1</sub> im][Tf <sub>2</sub> N]   | 0.1995             | 0.2206 | 0.4201       |
| [C <sub>4</sub> C <sub>1</sub> im][DMP]                 | 0.1997             | 0.1319 | 0.3316       |
| [C <sub>4</sub> C <sub>1</sub> im][DBP]                 | 0.1997             | 0.2621 | 0.4618       |
| [C <sub>4</sub> C <sub>1</sub> im][PF <sub>6</sub> ]    | 0.1995             | 0.1037 | 0.3032       |
| [C <sub>4</sub> C <sub>1</sub> im][SCN]                 | 0.1996             | 0.0695 | 0.2691       |
| [C <sub>4</sub> C <sub>1</sub> im][MeSO <sub>4</sub> ]  | 0.1997             | 0.1041 | 0.3037       |
| [C <sub>4</sub> C <sub>1</sub> im][OcSO <sub>4</sub> ]  | 0.1996             | 0.2573 | 0.4570       |
| [C <sub>4</sub> C <sub>1</sub> im][TFA]                 | 0.1997             | 0.0957 | 0.2954       |
| [C <sub>4</sub> C <sub>1</sub> pip][Tf <sub>2</sub> N]  | 0.2323             | 0.2207 | 0.4529       |
| [C <sub>4</sub> C <sub>1</sub> pyrr][Tf <sub>2</sub> N] | 0.2155             | 0.2207 | 0.4362       |
| [C <sub>4</sub> C <sub>1</sub> py][Tf <sub>2</sub> N]   | 0.2173             | 0.2206 | 0.4379       |
| [C <sub>1</sub> C <sub>1</sub> im][Tf <sub>2</sub> N]   | 0.1339             | 0.2205 | 0.3544       |
| [C <sub>2</sub> C <sub>1</sub> im][Tf <sub>2</sub> N]   | 0.1554             | 0.2206 | 0.3760       |
| [C <sub>6</sub> C <sub>1</sub> im][Tf <sub>2</sub> N]   | 0.2436             | 0.2206 | 0.4642       |
| [C <sub>10</sub> C <sub>1</sub> im][Tf <sub>2</sub> N]  | 0.3312             | 0.2206 | 0.5518       |

Table S4. Excess enthalpy of (ionic liquids + CH<sub>4</sub>) binary system at different temperatures predicted using COSMO-RS. The value is at  $x_{\text{CH}_4} = 0.01$  and given in J·mol<sup>-1</sup>

| Ionic liquid + CH <sub>4</sub>                          | T/K    | Methane            |                   |                   |                    | Cation             |                   |                   |                    | Anion              |                   |                   |                    |
|---------------------------------------------------------|--------|--------------------|-------------------|-------------------|--------------------|--------------------|-------------------|-------------------|--------------------|--------------------|-------------------|-------------------|--------------------|
|                                                         |        | $H_{\text{E,INT}}$ | $H_{\text{E,MF}}$ | $H_{\text{E,HB}}$ | $H_{\text{E,vdW}}$ | $H_{\text{E,INT}}$ | $H_{\text{E,MF}}$ | $H_{\text{E,HB}}$ | $H_{\text{E,vdW}}$ | $H_{\text{E,INT}}$ | $H_{\text{E,MF}}$ | $H_{\text{E,HB}}$ | $H_{\text{E,vdW}}$ |
| [C <sub>4</sub> C <sub>1</sub> im][Ac]                  | 298.15 | 34.44              | 34.19             | 0                 | 0.25               | -44.01             | -45.41            | 1.74              | -0.56              | 3.69               | 1.88              | 1.72              | 0.08               |
| [C <sub>4</sub> C <sub>1</sub> im][BF <sub>4</sub> ]    | 298.15 | 51.24              | 47.23             | 0                 | 4.01               | -41.81             | -40.36            | 2.73              | -4.58              | 18.84              | 16.32             | 2.72              | -0.20              |
| [C <sub>4</sub> C <sub>1</sub> im][Tf <sub>2</sub> N]   | 298.15 | 46.62              | 32.13             | 0                 | 14.49              | -13.63             | -5.46             | 1.09              | -9.30              | 3.14               | 1.77              | 1.09              | 0.10               |
| [C <sub>4</sub> C <sub>1</sub> im][DMP]                 | 298.15 | 34.13              | 33.51             | 0                 | 0.62               | -30.63             | -31.85            | 1.85              | -0.85              | -0.03              | -1.77             | 1.83              | 0.04               |
| [C <sub>4</sub> C <sub>1</sub> im][DBP]                 | 298.15 | 24.79              | 23.89             | 0                 | 0.9                | -11.78             | -12.14            | 1.23              | -0.96              | -2.17              | -3.50             | 1.22              | 0.15               |
| [C <sub>4</sub> C <sub>1</sub> im][PF <sub>6</sub> ]    | 298.15 | 55.50              | 46.83             | 0                 | 8.67               | -27.69             | -19.52            | 1.10              | -9.39              | 19.14              | 18.37             | 1.10              | -0.33              |
| [C <sub>4</sub> C <sub>1</sub> im][SCN]                 | 298.15 | 44.74              | 45.66             | 0                 | -0.92              | -40.50             | -43.96            | 1.88              | 1.18               | 16.36              | 14.11             | 1.86              | 0.39               |
| [C <sub>4</sub> C <sub>1</sub> im][MeSO <sub>4</sub> ]  | 298.15 | 41.99              | 40.71             | 0                 | 1.28               | -35.80             | -37.27            | 2.45              | -1.31              | 7.17               | 4.64              | 2.43              | 0.11               |
| [C <sub>4</sub> C <sub>1</sub> im][OcSO <sub>4</sub> ]  | 298.15 | 29.03              | 27.61             | 0                 | 1.42               | -10.52             | -10.91            | 1.52              | -1.24              | -0.09              | -1.83             | 1.52              | 0.22               |
| [C <sub>4</sub> C <sub>1</sub> im][TFA]                 | 298.15 | 43.63              | 36.54             | 0                 | 7.10               | -32.53             | -26.61            | 1.12              | -7.21              | 9.05               | 7.95              | 1.11              | -0.01              |
| [C <sub>4</sub> C <sub>1</sub> pip][Tf <sub>2</sub> N]  | 298.15 | 46.08              | 31.75             | 0                 | 14.33              | -16.91             | -8.73             | 0.70              | -8.89              | 4.12               | 3.23              | 0.70              | 0.03               |
| [C <sub>4</sub> C <sub>1</sub> pyrr][Tf <sub>2</sub> N] | 298.15 | 48.13              | 33.29             | 0                 | 14.85              | -15.72             | -7.43             | 0.74              | -9.05              | 3.92               | 2.97              | 0.74              | 0.04               |
| [C <sub>4</sub> C <sub>1</sub> py][Tf <sub>2</sub> N]   | 298.15 | 44.25              | 30.56             | 0                 | 13.69              | -16.29             | -7.87             | 0.93              | -9.26              | 3.69               | 2.56              | 0.93              | 0.05               |
| [C <sub>1</sub> C <sub>1</sub> im][Tf <sub>2</sub> N]   | 298.15 | 57.40              | 39.76             | 0                 | 17.65              | -6.86              | 1.69              | 1.33              | -9.88              | 1.54               | -0.19             | 1.34              | 0.20               |
| [C <sub>2</sub> C <sub>1</sub> im][Tf <sub>2</sub> N]   | 298.15 | 53.01              | 36.66             | 0                 | 16.35              | -11.22             | -2.61             | 1.19              | -9.86              | 2.86               | 1.33              | 1.21              | 0.14               |
| [C <sub>6</sub> C <sub>1</sub> im][Tf <sub>2</sub> N]   | 298.15 | 42.23              | 29.10             | 0                 | 13.13              | -14.16             | -6.35             | 0.99              | -8.77              | 2.99               | 1.74              | 1.00              | 0.07               |
| [C <sub>10</sub> C <sub>1</sub> im][Tf <sub>2</sub> N]  | 298.15 | 35.76              | 24.66             | 0                 | 11.10              | -14.07             | -7.34             | 0.85              | -7.65              | 2.69               | 1.64              | 0.85              | 0.05               |
| [C <sub>4</sub> C <sub>1</sub> im][Ac]                  | 313.15 | 36.01              | 35.66             | 0                 | 0.35               | -44.11             | -45.75            | 1.99              | -0.60              | 4.58               | 2.54              | 1.97              | 0.07               |
| [C <sub>4</sub> C <sub>1</sub> im][BF <sub>4</sub> ]    | 313.15 | 53.37              | 49.08             | 0                 | 4.29               | -41.84             | -40.31            | 2.87              | -4.80              | 19.95              | 17.29             | 2.86              | -0.19              |
| [C <sub>4</sub> C <sub>1</sub> im][Tf <sub>2</sub> N]   | 313.15 | 47.74              | 33.29             | 0                 | 14.45              | -13.58             | -5.56             | 1.13              | -9.20              | 3.00               | 1.64              | 1.14              | 0.03               |
| [C <sub>4</sub> C <sub>1</sub> im][DMP]                 | 313.15 | 35.94              | 35.21             | 0                 | 0.73               | -30.80             | -32.23            | 2.08              | -0.89              | 0.82               | -1.15             | 2.06              | 0.03               |
| [C <sub>4</sub> C <sub>1</sub> im][DBP]                 | 313.15 | 26.39              | 25.40             | 0                 | 1.00               | -11.93             | -12.48            | 1.42              | -0.98              | -1.86              | -3.35             | 1.42              | 0.12               |
| [C <sub>4</sub> C <sub>1</sub> im][PF <sub>6</sub> ]    | 313.15 | 57.14              | 48.21             | 0                 | 8.93               | -27.60             | -19.31            | 1.13              | -9.53              | 19.51              | 18.68             | 1.13              | -0.31              |
| [C <sub>4</sub> C <sub>1</sub> im][SCN]                 | 313.15 | 46.54              | 47.48             | 0                 | -0.94              | -40.30             | -43.98            | 2.05              | 1.22               | 17.43              | 15.03             | 2.03              | 0.37               |
| [C <sub>4</sub> C <sub>1</sub> im][MeSO <sub>4</sub> ]  | 313.15 | 44.01              | 42.59             | 0                 | 1.42               | -35.92             | -37.52            | 2.64              | -1.40              | 8.18               | 5.47              | 2.62              | 0.09               |
| [C <sub>4</sub> C <sub>1</sub> im][OcSO <sub>4</sub> ]  | 313.15 | 30.68              | 29.16             | 0                 | 1.52               | -10.66             | -11.18            | 1.67              | -1.27              | 0.07               | -1.76             | 1.66              | 0.17               |

|                                                         |        |       |       |   |       |        |        |      |       |       |       |      |       |
|---------------------------------------------------------|--------|-------|-------|---|-------|--------|--------|------|-------|-------|-------|------|-------|
| [C <sub>4</sub> C <sub>1</sub> im][TFA]                 | 313.15 | 45.39 | 38.17 | 0 | 7.22  | -32.64 | -26.95 | 1.34 | -7.21 | 9.80  | 8.49  | 1.32 | -0.01 |
| [C <sub>4</sub> C <sub>1</sub> pip][Tf <sub>2</sub> N]  | 313.15 | 46.94 | 32.66 | 0 | 14.28 | -16.96 | -8.88  | 0.71 | -8.80 | 3.95  | 3.11  | 0.71 | -0.03 |
| [C <sub>4</sub> C <sub>1</sub> pyrr][Tf <sub>2</sub> N] | 313.15 | 49.03 | 34.23 | 0 | 14.79 | -15.78 | -7.59  | 0.75 | -8.94 | 3.75  | 2.85  | 0.75 | -0.02 |
| [C <sub>4</sub> C <sub>1</sub> py][Tf <sub>2</sub> N]   | 313.15 | 45.28 | 31.62 | 0 | 13.66 | -16.27 | -7.97  | 0.96 | -9.16 | 3.56  | 2.44  | 0.96 | -0.01 |
| [C <sub>1</sub> C <sub>1</sub> im][Tf <sub>2</sub> N]   | 313.15 | 58.66 | 41.12 | 0 | 17.54 | -6.57  | 1.74   | 1.41 | -9.72 | 1.43  | -0.33 | 1.42 | 0.11  |
| [C <sub>2</sub> C <sub>1</sub> im][Tf <sub>2</sub> N]   | 313.15 | 54.21 | 37.93 | 0 | 16.27 | -10.99 | -2.61  | 1.26 | -9.71 | 2.73  | 1.19  | 1.27 | 0.07  |
| [C <sub>6</sub> C <sub>1</sub> im][Tf <sub>2</sub> N]   | 313.15 | 43.29 | 30.18 | 0 | 13.10 | -14.22 | -6.53  | 1.03 | -8.70 | 2.86  | 1.62  | 1.04 | 0.01  |
| [C <sub>10</sub> C <sub>1</sub> im][Tf <sub>2</sub> N]  | 313.15 | 36.67 | 25.58 | 0 | 11.09 | -14.29 | -7.63  | 0.87 | -7.60 | 2.57  | 1.53  | 0.88 | 0.00  |
| [C <sub>4</sub> C <sub>1</sub> im][Ac]                  | 328.15 | 37.64 | 37.20 | 0 | 0.44  | -44.28 | -46.15 | 2.22 | -0.64 | 5.48  | 3.21  | 2.20 | 0.07  |
| [C <sub>4</sub> C <sub>1</sub> im][BF <sub>4</sub> ]    | 328.15 | 55.40 | 50.85 | 0 | 4.54  | -41.88 | -40.25 | 2.97 | -5.01 | 20.99 | 18.22 | 2.95 | -0.18 |
| [C <sub>4</sub> C <sub>1</sub> im][Tf <sub>2</sub> N]   | 328.15 | 48.75 | 34.37 | 0 | 14.38 | -13.56 | -5.68  | 1.16 | -9.09 | 2.82  | 1.49  | 1.17 | -0.03 |
| [C <sub>4</sub> C <sub>1</sub> im][DMP]                 | 328.15 | 37.76 | 36.93 | 0 | 0.84  | -31.02 | -32.63 | 2.29 | -0.94 | 1.63  | -0.53 | 2.27 | 0.01  |
| [C <sub>4</sub> C <sub>1</sub> im][DBP]                 | 328.15 | 28.00 | 26.91 | 0 | 1.09  | -12.11 | -12.82 | 1.60 | -1.00 | -1.57 | -3.21 | 1.59 | 0.09  |
| [C <sub>4</sub> C <sub>1</sub> im][PF <sub>6</sub> ]    | 328.15 | 58.65 | 49.50 | 0 | 9.15  | -27.52 | -19.14 | 1.15 | -9.64 | 19.75 | 18.88 | 1.14 | -0.28 |
| [C <sub>4</sub> C <sub>1</sub> im][SCN]                 | 328.15 | 48.30 | 49.27 | 0 | -0.96 | -40.15 | -44.02 | 2.19 | 1.26  | 18.45 | 15.93 | 2.17 | 0.35  |
| [C <sub>4</sub> C <sub>1</sub> im][MeSO <sub>4</sub> ]  | 328.15 | 45.98 | 44.43 | 0 | 1.55  | -36.07 | -37.76 | 2.79 | -1.48 | 9.13  | 6.29  | 2.77 | 0.07  |
| [C <sub>4</sub> C <sub>1</sub> im][OcSO <sub>4</sub> ]  | 328.15 | 32.28 | 30.66 | 0 | 1.62  | -10.82 | -11.42 | 1.78 | -1.30 | 0.19  | -1.71 | 1.78 | 0.13  |
| [C <sub>4</sub> C <sub>1</sub> im][TFA]                 | 328.15 | 47.12 | 39.79 | 0 | 7.33  | -32.77 | -27.30 | 1.53 | -7.21 | 10.53 | 9.01  | 1.52 | 0.00  |
| [C <sub>4</sub> C <sub>1</sub> pip][Tf <sub>2</sub> N]  | 328.15 | 47.72 | 33.50 | 0 | 14.22 | -17.03 | -9.04  | 0.71 | -8.70 | 3.74  | 2.96  | 0.71 | -0.09 |
| [C <sub>4</sub> C <sub>1</sub> pyrr][Tf <sub>2</sub> N] | 328.15 | 49.82 | 35.11 | 0 | 14.72 | -15.84 | -7.77  | 0.75 | -8.84 | 3.53  | 2.69  | 0.75 | -0.09 |
| [C <sub>4</sub> C <sub>1</sub> py][Tf <sub>2</sub> N]   | 328.15 | 46.21 | 32.60 | 0 | 13.61 | -16.27 | -8.08  | 0.97 | -9.05 | 3.37  | 2.28  | 0.98 | -0.06 |
| [C <sub>1</sub> C <sub>1</sub> im][Tf <sub>2</sub> N]   | 328.15 | 59.80 | 42.40 | 0 | 17.40 | -6.34  | 1.75   | 1.47 | -9.56 | 1.24  | -0.52 | 1.48 | 0.03  |
| [C <sub>2</sub> C <sub>1</sub> im][Tf <sub>2</sub> N]   | 328.15 | 55.29 | 39.11 | 0 | 16.18 | -10.83 | -2.63  | 1.30 | -9.56 | 2.55  | 1.02  | 1.31 | 0.00  |
| [C <sub>6</sub> C <sub>1</sub> im][Tf <sub>2</sub> N]   | 328.15 | 44.24 | 31.18 | 0 | 13.06 | -14.31 | -6.73  | 1.06 | -8.61 | 2.69  | 1.48  | 1.06 | -0.04 |
| [C <sub>10</sub> C <sub>1</sub> im][Tf <sub>2</sub> N]  | 328.15 | 37.49 | 26.43 | 0 | 11.06 | -14.50 | -7.91  | 0.88 | -7.54 | 2.42  | 1.41  | 0.88 | -0.04 |
| [C <sub>4</sub> C <sub>1</sub> im][Ac]                  | 343.15 | 39.49 | 38.96 | 0 | 0.52  | -44.52 | -46.59 | 2.43 | -0.68 | 6.37  | 3.90  | 2.41 | 0.06  |
| [C <sub>4</sub> C <sub>1</sub> im][BF <sub>4</sub> ]    | 343.15 | 57.55 | 52.77 | 0 | 4.79  | -41.96 | -40.18 | 3.02 | -5.19 | 21.93 | 19.11 | 3.00 | -0.17 |
| [C <sub>4</sub> C <sub>1</sub> im][Tf <sub>2</sub> N]   | 343.15 | 49.81 | 35.47 | 0 | 14.34 | -13.56 | -5.82  | 1.17 | -8.97 | 2.58  | 1.29  | 1.18 | -0.09 |
| [C <sub>4</sub> C <sub>1</sub> im][DMP]                 | 343.15 | 39.71 | 38.78 | 0 | 0.94  | -31.27 | -33.05 | 2.47 | -0.99 | 2.41  | 0.08  | 2.45 | -0.01 |
| [C <sub>4</sub> C <sub>1</sub> im][DBP]                 | 343.15 | 29.65 | 28.47 | 0 | 1.17  | -12.32 | -13.17 | 1.74 | -1.02 | -1.33 | -3.09 | 1.74 | 0.06  |
| [C <sub>4</sub> C <sub>1</sub> im][PF <sub>6</sub> ]    | 343.15 | 60.25 | 50.89 | 0 | 9.36  | -27.46 | -19.00 | 1.14 | -9.71 | 19.87 | 18.98 | 1.14 | -0.25 |
| [C <sub>4</sub> C <sub>1</sub> im][SCN]                 | 343.15 | 50.24 | 51.22 | 0 | -0.98 | -40.06 | -44.06 | 2.30 | 1.29  | 19.40 | 16.80 | 2.28 | 0.33  |

|                                                         |        |       |       |   |       |        |        |      |       |       |       |      |       |
|---------------------------------------------------------|--------|-------|-------|---|-------|--------|--------|------|-------|-------|-------|------|-------|
| [C <sub>4</sub> C <sub>1</sub> im][MeSO <sub>4</sub> ]  | 343.15 | 48.06 | 46.39 | 0 | 1.67  | -36.27 | -38.00 | 2.90 | -1.55 | 10.01 | 7.09  | 2.88 | 0.05  |
| [C <sub>4</sub> C <sub>1</sub> im][OcSO <sub>4</sub> ]  | 343.15 | 33.89 | 32.18 | 0 | 1.71  | -11.00 | -11.69 | 1.87 | -1.33 | 0.25  | -1.68 | 1.86 | 0.08  |
| [C <sub>4</sub> C <sub>1</sub> im][TFA]                 | 343.15 | 48.99 | 41.56 | 0 | 7.43  | -32.93 | -27.66 | 1.71 | -7.19 | 11.23 | 9.53  | 1.69 | 0.00  |
| [C <sub>4</sub> C <sub>1</sub> pip][Tf <sub>2</sub> N]  | 343.15 | 48.54 | 34.37 | 0 | 14.17 | -17.11 | -9.22  | 0.70 | -8.59 | 3.48  | 2.77  | 0.70 | -0.16 |
| [C <sub>4</sub> C <sub>1</sub> pyrr][Tf <sub>2</sub> N] | 343.15 | 50.68 | 36.02 | 0 | 14.66 | -15.92 | -7.94  | 0.74 | -8.73 | 3.28  | 2.51  | 0.74 | -0.15 |
| [C <sub>4</sub> C <sub>1</sub> py][Tf <sub>2</sub> N]   | 343.15 | 47.18 | 33.59 | 0 | 13.59 | -16.30 | -8.21  | 0.97 | -8.94 | 3.13  | 2.10  | 0.97 | -0.12 |
| [C <sub>1</sub> C <sub>1</sub> im][Tf <sub>2</sub> N]   | 343.15 | 61.07 | 43.74 | 0 | 17.32 | -6.18  | 1.73   | 1.50 | -9.40 | 0.98  | -0.74 | 1.50 | -0.05 |
| [C <sub>2</sub> C <sub>1</sub> im][Tf <sub>2</sub> N]   | 343.15 | 56.47 | 40.35 | 0 | 16.12 | -10.70 | -2.68  | 1.32 | -9.41 | 2.30  | 0.82  | 1.33 | -0.07 |
| [C <sub>6</sub> C <sub>1</sub> im][Tf <sub>2</sub> N]   | 343.15 | 45.22 | 32.19 | 0 | 13.03 | -14.41 | -6.93  | 1.06 | -8.52 | 2.47  | 1.30  | 1.06 | -0.09 |
| [C <sub>10</sub> C <sub>1</sub> im][Tf <sub>2</sub> N]  | 343.15 | 38.31 | 27.27 | 0 | 11.04 | -14.72 | -8.20  | 0.87 | -7.48 | 2.23  | 1.27  | 0.88 | -0.08 |

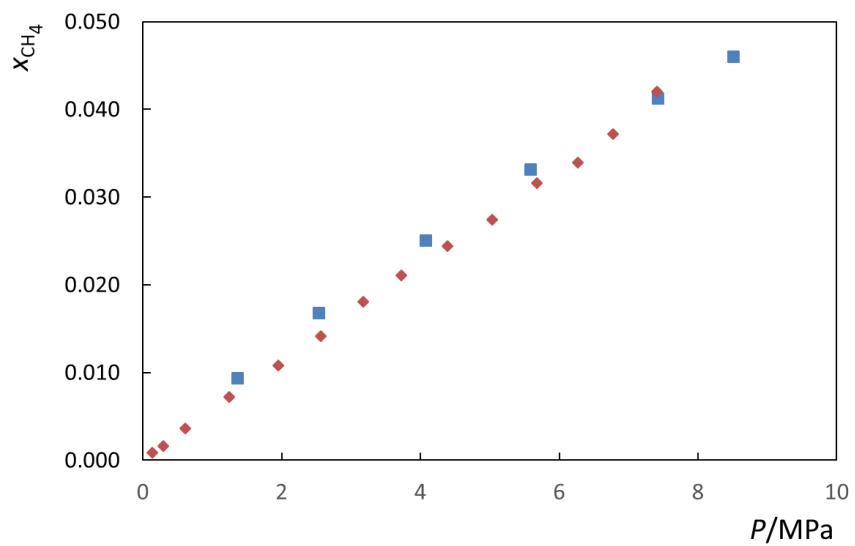

Figure S1. Solubility of  $CH_4$  in ionic liquid  $[C_4C_{1im}][MeSO_4]$ . Symbols: (■), The data from reference <sup>1</sup> at temperature 293.15 K; (◆), the data from this work at 298.15 K.



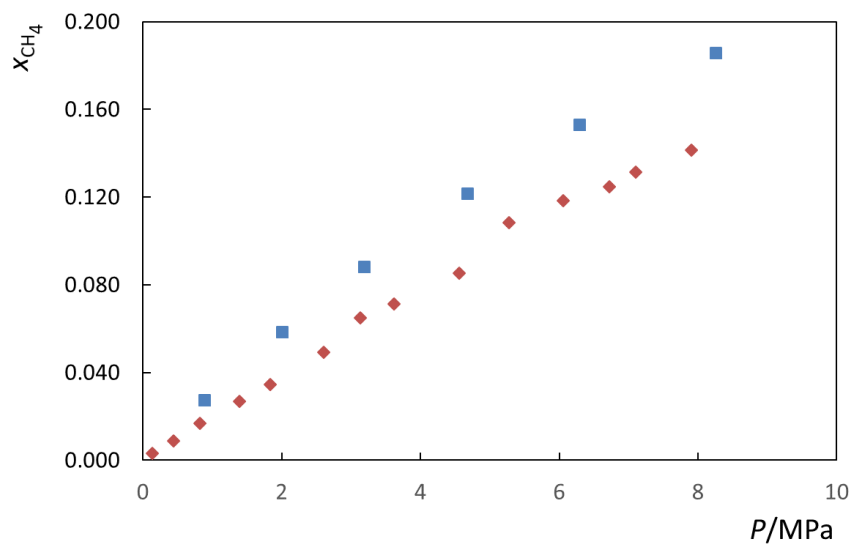

Figure S2. Solubility of CH<sub>4</sub> in ionic liquid [C<sub>4</sub>C<sub>1</sub>im][Tf<sub>2</sub>N]. Symbols: (■), The data from reference <sup>2</sup> at temperature 293.15 K; (◆), the data from this work at 298.15 K.

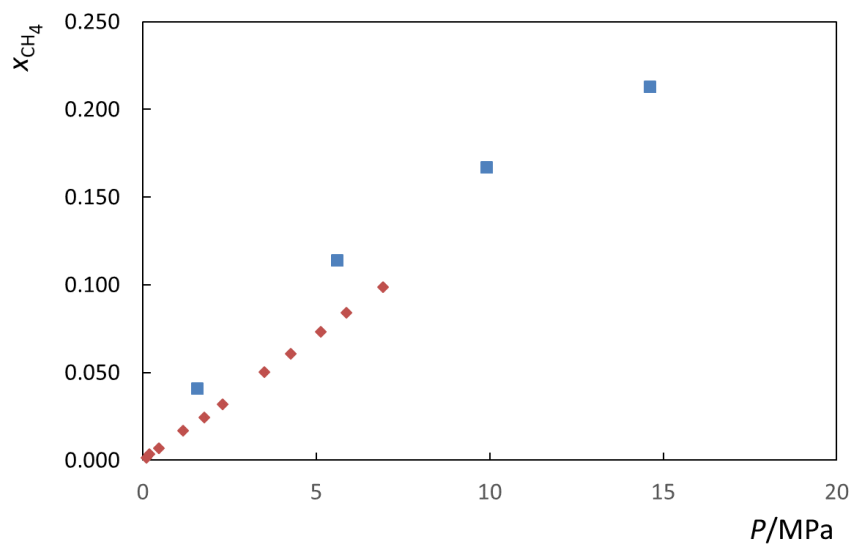

Figure S3. Solubility of CH<sub>4</sub> in ionic liquid [C<sub>4</sub>C<sub>1</sub>im][Tf<sub>2</sub>N]. Symbols: (■), The data from reference <sup>3</sup> at temperature 313.15 K; (◆), the data from this work at 313.15 K.

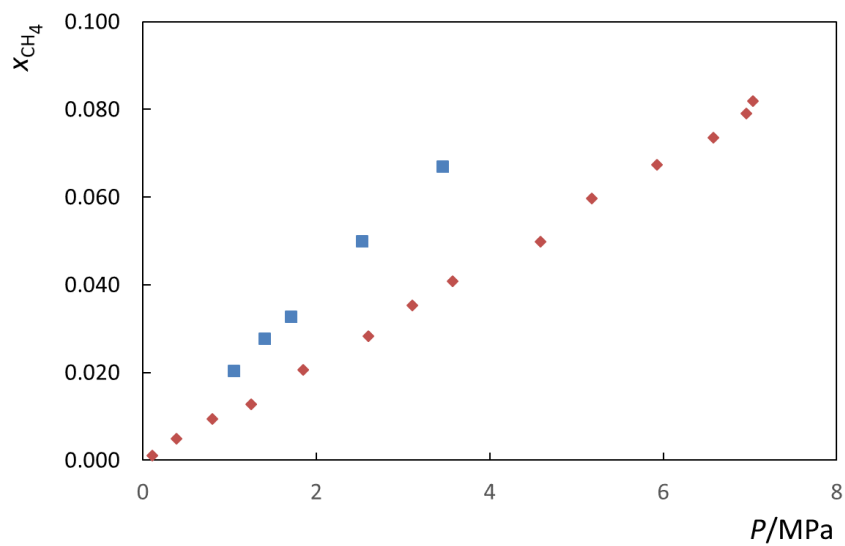

Figure S4. Solubility of CH<sub>4</sub> in ionic liquid [C<sub>4</sub>C<sub>1</sub>im][Tf<sub>2</sub>N]. Symbols: (■), The data from reference<sup>4</sup> at temperature 313.15 K; (◆), the data from this work at 313.15 K.

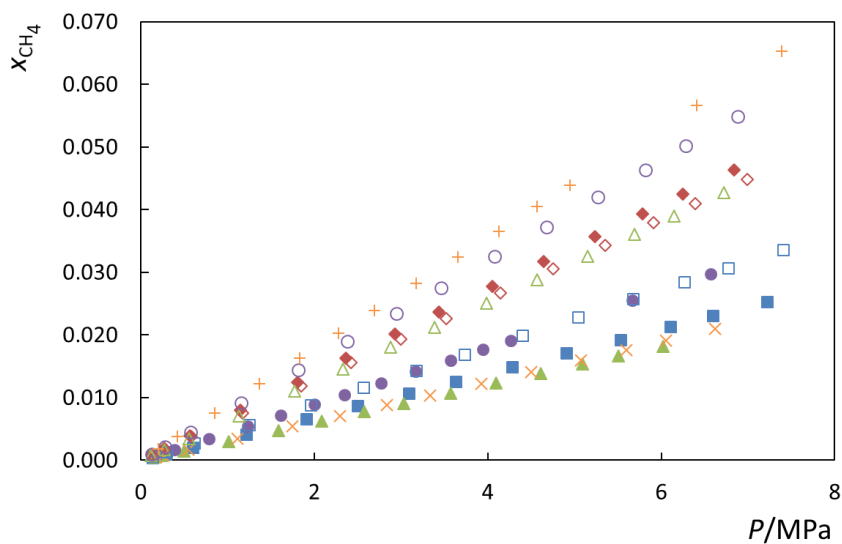

Figure S5. Predicted solubility of  $\text{CH}_4$ ,  $x_{\text{CH}_4}$ , in ionic liquid with different anion as function of pressure,  $P$ , at temperature 298.15 K using COSMO-RS. Symbols: (■),  $[\text{C}_4\text{C}_{1\text{im}}][\text{SCN}]$ ; (◆),  $[\text{C}_4\text{C}_{1\text{im}}][\text{Ac}]$ ; (▲),  $[\text{C}_4\text{C}_{1\text{im}}][\text{BF}_4]$ ; (●),  $[\text{C}_4\text{C}_{1\text{im}}][\text{TFA}]$ ; (×),  $[\text{C}_4\text{C}_{1\text{im}}][\text{PF}_6]$ ; (□),  $[\text{C}_4\text{C}_{1\text{im}}][\text{MeSO}_4]$ ; (◊),  $[\text{C}_4\text{C}_{1\text{im}}][\text{DMP}]$ ; (△),  $[\text{C}_4\text{C}_{1\text{im}}][\text{Tf}_2\text{N}]$ ; (○),  $[\text{C}_4\text{C}_{1\text{im}}][\text{OcSO}_4]$ , and (+),  $[\text{C}_4\text{C}_{1\text{im}}][\text{DBP}]$ .

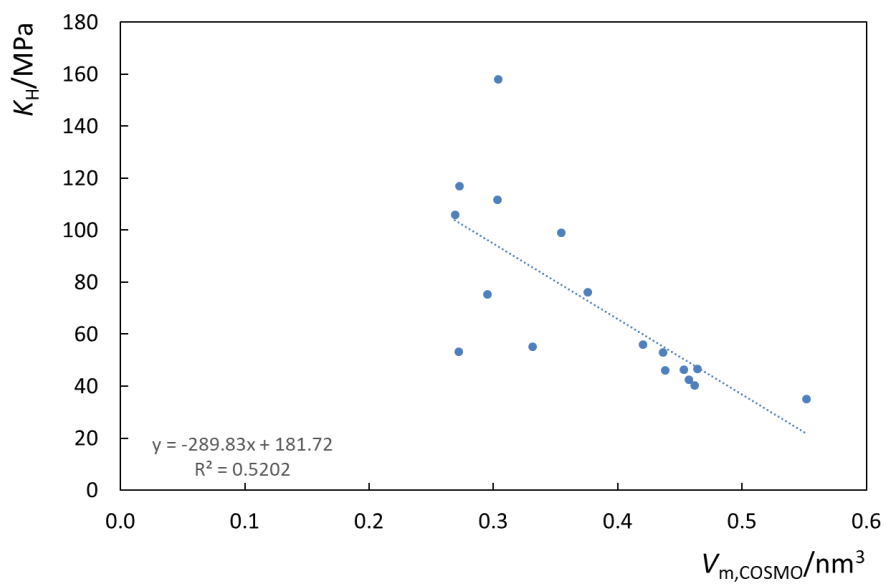

Figure S6. Plot of predicted volume of ionic liquid using COSMO-RS,  $V_{m,COSMO}$ , against experimentally calculated Henry's law constant,  $K_H$ , of  $CH_4$  in ionic liquids at temperature 298.15 K.

## References

1. J. Kumelan, Á. P.-S. Kamps, D. Tuma and G. Maurer, *J. Chem. Eng. Data*, 2007, **52**, 2319-2324.
2. J. Kumelan, Á. P.-S. Kamps, D. Tuma and G. Maurer, *Ind. Eng. Chem. Res.*, 2007, **46**, 8236-8240.
3. P. J. Carvalho and J. A. P. Coutinho, *Energy and Environmental Science*, 2011, **4**, 4614-4619.
4. X. Liu, W. Afzal and J. M. Prausnitz, *Ind. Eng. Chem. Res.*, 2013, **52**, 14975-14978.
